# Supplementary material for: Transformation Asymmetry and the Evolution of the Bacterial Accessory Genome
Source: PubMed Central journal article supplement (PMC5850275; doi:10.1093/molbev/msx309), 2017-12-01
Supplement: msx309_supp.pdf [file msx309_supp.pdf]

1 **Supplementary Materials**

2

3

4 **Transformation asymmetry and the evolution of the bacterial accessory**

5 **genome**

6

7

8 Text S1-S4

9 Figures S1-S15

10 Tables S1-S2

11 Supplementary References

12

1 **Text S1: Models for transfer of heterologous sequence by homologous**  
2 **recombination**

3 Assume a locus  $j$  of length  $L_D$  in the donor and  $L_R$  in the recipient that can be  
4 exchanged through recombination if the recombination includes both a  
5 homologous arm in the 5' region upstream of  $j$  that is of length at least  $H_{5'}$ , and a  
6 second homologous arm in the 3' region downstream of  $j$  that is of length at least  
7  $H_{3'}$  (Fig 1A). In this model, a balanced situation is assumed in which both  $H_{5'}$  and  
8  $H_{3'}$  are of an identical length,  $H$ . The donor and recipient share a total core  $C$ ,  
9 throughout which both have complete sequence identity, whereas it is assumed  
10 there is no sequence similarity within  $j$ . Recombinations are assumed to initiate  
11 at a uniform per nucleotide frequency of  $\tau$  within  $C$ . The start point is denoted  $i$ ,  
12 which is positioned  $d$  nucleotides upstream of  $j$  (Fig 1A). Recombinations that  
13 terminate within  $j$  are assumed to fail; only those which begin and terminate  
14 within  $C$ , and encompass  $j$ ,  $H_{5'}$  and  $H_{3'}$  succeed in exchanging  $j$ , an event denoted  
15  $e\{j\}$ . The probability of this,  $p(e\{j\})$ , given the initiation point  $i$ , can be expressed  
16 as:

$$p(e\{j\}|i) = p(r\{d\} \cap r\{j\} \cap r\{H_{3'}\}), \text{ for } H \leq d < C-H$$

17  
18  
19  
20 Where notation of the type  $r\{d\}$  denotes a recombination spanning length  $d$ .  
21 Recombinations are assumed to terminate with a frequency of  $\lambda_R$  per base in  
22 regions of sequence similarity between the donor and recipient. They therefore  
23 have a geometric length distribution, in accordance with experimental and  
24 bioinformatic analyses (Croucher et al. 2012). Therefore the probability that a  
25 recombination spans a length of at least  $d$  can be expressed as:

$$p(r\{d\}) = (1 - \lambda_R)^d$$

26  
27  
28 Similarly, the homologous arm on the 3' side of  $j$  must span a region of sequence  
29 similarity, and so the probability that a recombination spans at least  $H$  bases on  
30 the 3' side of  $j$  is:

31

$$p(r\{H_{3'}\}) = (1 - \lambda_R)^H$$

1

2 By analogy, if recombinations terminate with a frequency of  $\lambda_I$  per nucleotide in  
3 heterologous regions, then the probability that the recombination will span the  
4 locus  $j$ , defined as being divergent between the donor and recipient, with length  
5  $L$ , is:

6

$$p(r\{j\}) = (1 - \lambda_I)^L$$

7

8 The geometric distribution has the property that:

9

$$p(x > y + z) = p(x > y)p(x > z)$$

10

11 Therefore, returning to the expression for the exchange of locus  $j$ :

12

$$p(e\{j\}|i) = p(r\{d\} \cap r\{j\} \cap r\{H_{3'}\}), \text{ for } H \leq d < C-H$$

14

15 For a fixed initiation point  $i$ , this expression can be considered equivalent to the  
16 probability the recombination length,  $l_r$ , is equal to or greater than the combined  
17 total distance of  $d, j$  and  $H_{3'}$ . As each component of the probability is distributed  
18 geometrically, this overall probability can be expressed as:

19

$$p(e\{j\}|i) = p(l_r \geq d + L + H) = p(l_r \geq d)p(l_r \geq L)p(l_r \geq H)$$

20

21 Using the original terminology, this is equivalent to:

22

$$p(e\{j\} | i) = p(r\{d\})p(r\{L\})p(r\{H_{3'}\})$$

24

25 Therefore, combining the individual probabilities derived above:

26

$$p(e\{j\}|i) = (1 - \lambda_R)^d (1 - \lambda_I)^L (1 - \lambda_R)^H \text{ for } H \leq d \leq C-H$$

28

$$p(e\{j\}|i) = (1 - \lambda_R)^{d+H} (1 - \lambda_I)^L \text{ for } H \geq d \geq C-H$$

29

1

2 To calculate the overall  $p(e\{j\})$ , it is necessary to sum over the possible range of  $d$   
3 values on both the upstream and downstream sides of  $j$ , and adjust by the overall  
4 probability of any transformation initiating between the donor and recipient by  
5 including the per nucleotide rate of transformation event initiation,  $\tau$ :

6

$$p(e\{j\}) = \sum_{d=H}^{C-H-1} 2\tau(1 - \lambda_R)^{d+H}(1 - \lambda_I)^L$$

7

8 This expression includes a factor of two to account for recombinations initiating  
9 on either side of  $j$  being able to exchange the locus, depending on the strand of  
10 the chromosome to which they anneal. Based on different assumptions about the  
11 nature of  $L$ , four different models with different consequences for bacterial  
12 evolution can be proposed:

13

14 **1. Insertion-limited transformation:**  $L = L_D, \lambda_I > 0$

15

16 Under this model,  $L$  corresponds to  $L_D$ , such that transformations become less  
17 efficient the larger  $j$  is in the donor. Such a model would be expected to apply  
18 were transformation limited by cleavage of the imported DNA strand, or the  
19 scale or flexibility of the RecA-bound nucleoprotein filament involved in the  
20 recombination.

21

22 **2. Deletion-limited transformation:**  $L = L_R, \lambda_I > 0$

23

24 Under this model,  $L$  corresponds to  $L_R$ , such that transformations become less  
25 efficient the larger  $j$  is in the recipient. Such a model would be expected to apply  
26 if transformation were limited by the scale or flexibility of the chromosomal  
27 locus involved in the recombination, or by the increasingly long time taken for  
28 the second homologous arm to locate a more distant binding site and anneal,  
29 after the first arm has bound.

30

31 **3. Annealing-limited transformation:**  $L = 0$  or  $\lambda_I = 0$

1

2 Under this model, neither  $L_D$  nor  $L_R$  contribute to  $L$  (or  $\lambda_I = 0$ ), such that regions  
 3 of heterology do not affect the efficiency of homologous recombination. Such a  
 4 model would be expected to apply if transformation were limited by the  
 5 annealing of homologous sequence, or the stability of the resulting heteroduplex  
 6 complex, but unaffected by any intervening heterologous sequence.

7

8 **4. Heterology-limited transformation:  $L \propto (L_D + L_R)$ ,  $\lambda_I > 0$**

9

10 Under this model, both  $L_D$  and  $L_R$  contribute to  $L$ , such that transformations  
 11 become less efficient according to the size of  $j$  in both the donor and recipient.  
 12 Such a model would be expected to apply if there were limitations imposed by  
 13 the scale and flexibility of both the chromosomal locus and the RecA-coated  
 14 nucleoprotein filament, or inhibition of exchange by the slower annealing of the  
 15 second homologous arm as the separation of the flanking regions of similarity  
 16 increases in terms of both the donor and recipient DNA.

17

18 **Quantifying the rate of exchange**

19

20 Using an analogous approach, the rate at which a single nucleotide  
 21 polymorphism (SNP)  $S$  were acquired by transformation could be modelled as:

22

$$p(e\{S\}) = \sum_{d=h}^{C-h-1} 2\tau(1 - \lambda_R)^{d+h}$$

23

24 Where  $h$  is the length of a homologous arm necessary to exchange a  
 25 polymorphism within a region of sequence similarity. As the SNP, by definition, is  
 26 in a homologous region,  $L = 0$ . Measuring this rate allows the effect of  $L$  on  $e\{j\}$  to  
 27 be estimated without directly measuring  $\tau$  or  $H$  by estimating the ratio:

28

$$\frac{p(e\{j\})}{p(e\{S\})} = \frac{\sum_{d=H}^{C-H-1} 2\tau(1 - \lambda_R)^{d+H}(1 - \lambda_I)^L}{\sum_{d=h}^{C-h-1} 2\tau(1 - \lambda_R)^{d+h}}$$

29

1 Assuming that  $H$  and  $h$  are independent of  $L$  (i.e. the same homologous arm  
2 lengths are involved in the exchange of any size of heterologous locus), a  
3 summary term  $\tau_I$  can be introduced:

4

$$\tau_I = \frac{\sum_{d=H}^{C-H-1} (1 - \lambda_R)^{d+H}}{\sum_{d=h}^{C-h-1} (1 - \lambda_R)^{d+h}}$$

5

6 Allowing  $\tau$  to vary with  $L$ , such that the relative transformation rate of each  
7 genotype  $g$  varies according to the parameter  $\tau_g$ , results in a model of the relative  
8 rate at which regions of heterology and SNPs are acquired by transformation  
9 with the form:

10

$$\frac{p(e\{j\}|g)}{p(e\{S\}|g)} = \frac{\tau_g \tau_I (1 - \lambda_I)^L}{\tau_g}$$

11

12 Where  $L$  can be defined in terms of  $L_R$  and  $L_D$  according to the four different  
13 models.

14

15 The model was fitted to the experimental data using measurements of both  $e\{S\}$   
16 and  $e\{j\}$ . The observed  $e\{S\}$  for a particular genotype was assumed to reflect the  
17 transformation rate with which it was associated,  $\tau_g$ :

18

$$p(e\{S\}) = \tau_g$$

19

20 This genotype-specific estimate was then used to inform estimation of the  $\tau_I$  and  
21  $\lambda_I$  parameters using the measured rates of  $e\{j\}$ , which were assumed to be  
22 independent of  $L$ :

23

24

$$p(e\{j\}) = \tau_g \tau_I (1 - \lambda_I)^L$$

25

26 The observed number of transformants per millilitre that had exchanged  
27 sequence at  $j$  ( $x_{j,L}$ ) or had acquired a SNP ( $x_{S,L}$ ) for a given genotype were  
28 assumed to be Poisson distributed around the mean defined by the functions

1 above. For experiments using 1000 ng  $\mu\text{L}^{-1}$  of donor DNA, rather than 100 ng  $\mu\text{L}^{-1}$ ,  
 2  $x_{j,L}$  and  $x_{S,L}$  were reduced ten-fold, a correction that assumed the quantity of  
 3 added genomic DNA to be non-saturating. The estimates of  $\tau_g$  for  $L = 20$  kb  
 4 shown in Fig S11, which include adjusted estimates of transformability from  
 5 both donor DNA concentrations, indicate this assumption is justified.

6

7 Therefore the maximum log likelihood estimate,  $l$ , of  $\tau_g$ ,  $\tau_I$  and  $\lambda_I$  given the data  
 8 for  $n$  lengths of  $j$  from  $L_1$  to  $L_n$ , with  $m$  biological replicates ( $q_1 \dots q_m$ ) of each, was  
 9 achieved using the Brent method and the initial parameter estimates  $\tau_I = 1$ , and  
 10  $\lambda_I = 0 \text{ bp}^{-1}$  ( $\tau_g$  was initialised as the mean of  $x_{S,L}$  over the  $q_m$  replicates for  
 11 genotype  $g$ ), and the function:

12

$$\begin{aligned} & \ell(\lambda_I, \tau_g, \tau_I; x_{j,L}, x_{S,L}) \\ &= \sum_{L=L_1}^{L_n} \left[ \log(\tau_g \tau_I (1 - \lambda_I)^L) \sum_{q=q_1}^{q_m} x_{j,L,q} - m(\tau_g \tau_I (1 - \lambda_I)^L) + \log(\tau_g) \sum_{q=q_1}^{q_m} x_{S,L,q} - m(\tau_g) \right] \end{aligned}$$

13

14 Bootstrapping was used to quantify the uncertainty in these estimates. The 93  
 15 paired measurements of  $e_I\{j\}$  and  $e\{S\}$  for the insertion of regions of heterology  
 16 were resampled with replacement 100 times, and the model refitted to each of  
 17 these datasets to identify the full range of estimates for  $\tau_I$ ,  $\lambda_I$  and  $\tau_g$ . This process  
 18 was repeated independently for the 90 paired measurements of  $e_D\{j\}$  and  $e\{S\}$  for  
 19 the deletion of regions of heterology.

20

## 21 **Quantifying the asymmetry of exchange**

22

23 The asymmetry of transformation for length  $L$ ,  $\varphi_L$ , can be defined as:

24

$$\varphi_L = \frac{e_{I,L}\{j\}e_{D,L}\{S\}}{e_{I,L}\{S\}e_{D,L}\{j\}}$$

25

26 Based on the data shown in Fig 2A, model 1 was assumed to apply to insertions.

27 The relationship between  $L$  and  $e_D\{j\}$  was less clear, and hence the change in  $e_I\{j\}$

1 with  $L$  was assumed to dominate the magnitude of  $\varphi_L$ . Therefore the fitted  
 2 function was of the form:

3

$$\varphi_L = \varphi_0(1 - \lambda_\varphi)^L$$

4

5 Where  $\varphi_0$  is the theoretical asymmetry of a zero-length locus  $j$ , and  $\lambda_\varphi$  defines the  
 6 change in asymmetry with  $L$ . Using the pairs of insertion and deletion

7 experiments for each locus  $j$  of length  $L$ , the observed data were  $x_{I,j,L}$  for insertion  
 8 of locus  $j$ ;  $x_{I,S,L}$  for SNP transfer in the insertion experiment;  $x_{D,j,L}$  for deletion of

9 locus  $j$ ; and  $x_{D,S,L}$  for SNP transfer in the deletion experiment. For each  $L$  ( $L_1 \dots L_n$ ),

10 there were  $m$  values ( $q_1 \dots q_m$ ), corresponding to all combinations of

11 measurements of  $x_{I,j,L}/x_{I,S,L}$  and  $x_{D,j,L}/x_{D,S,L}$ . Therefore the maximum log likelihood

12 estimate,  $l$ , of  $\varphi_0$  and  $\lambda_\varphi$  given the data for  $n$  lengths of  $j$  from  $L_1$  to  $L_n$  was

13 achieved through maximising the log likelihood, assuming measurements to be

14 Poisson distributed around a mean value determined by the above formula,

15 using the Brent method and initial parameter estimates  $\varphi_0 = 1$  and  $\lambda_\varphi = 10^{-9} \text{ bp}^{-1}$ ,

16 and the function:

17

$$\begin{aligned} & \ell(\lambda_\varphi, \varphi_0; x_{I,j,L}, x_{I,S,L}, x_{D,j,L}, x_{D,S,L}) \\ &= \sum_{L=L_1}^{L_n} \left[ \log(\varphi_0(1 - \lambda_\varphi)^L) \sum_{q=q_1}^{q_m} \frac{x_{I,j,L,q} x_{D,S,L,q}}{x_{I,S,L,q} x_{D,j,L,q}} - m(\varphi_0(1 - \lambda_\varphi)^L) \right] \end{aligned}$$

18

19 One hundred bootstrap replicates were again used to measure the variation in

20 parameter estimates.

21



1 **Text S2: Models for deletion of heterologous DNA by short fragments**

2 With modification, the models described in Text S1 can be applied to the deletion  
3 of genomic islands by short DNA fragments. In this case,  $L$  can be assumed to be  
4 zero, as  $e\{j\}$  appears to be insertion-limited and  $L_D = 0$ , based on the results in Fig  
5 2.  $C$  represents the size of the PCR fragment, as this donor DNA is no longer  
6 circular; hence the furthest a recombination can start or end relative to  $j$  is  $C/2$ .  
7 In each of these models, the factor of two that results from recombinations being  
8 able to affect either strand of the genome is omitted, because the two halves of  
9 the DNA fragment are considered indistinguishable, and all experimental  
10 quantifications of rates are relative. Under these circumstances, four alternative  
11 models can be defined based on the nature of two key assumptions. The first  
12 assumption is that  $H$  is either a distance that must exceed a threshold on both  
13 sides of  $j$  to resolve a recombination (based on Fig 1A,  $H = H_{5'} = H_{3'}$ ), or  $2H$  is a  
14 total distance that may be distributed across  $j$  in an unbalanced manner ( $2H = H_{5'} + H_{3'}$ ). The second assumption regards the termination of recombination. One  
15 hypothesis is that a process must actively terminate the recombination before  
16 the end of the added donor DNA fragment. This may represent nicking of the  
17 DNA on its import, or strand processing at a crossover. Alternatively, no active  
18 termination may need to be instigated, and instead successful resolution may  
19 automatically be triggered upon reaching the end of the added donor DNA  
20 fragment.  
21

22  
23 For the experiments shown in Fig 3A,  $j$  is centrally located within  $C$ . For a  
24 recombination initiating  $d$  bases from  $j$  at  $i$ , which is constrained to be between  
25 one and  $C/2$  bases from  $j$ , the probability that the recombination reaches  $j$  is:  
26

$$p(r\{d\}) = (1 - \lambda_R)^d$$

27  
28 For the exchange of  $j$  to occur, corresponding to a deletion and the restoration of  
29 an intact *tetM* gene in this case, the recombination must also span  $H_{3'}$   
30 downstream of  $j$ . This is assumed to correspond to:  
31

$$p(r\{H_{3'}\}) = (1 - \lambda_R)^H$$

1

2 Assuming the homologous arms are balanced across  $j$ , as in the model described  
3 in Text S1, both  $H_{5'}$  and  $H_{3'}$  must be at least  $H$  in length. Therefore:

4

5

$$H_{3'} \geq H$$

6

7 However, if the homologous arms can be unbalanced across  $j$ , then  $H_{5'}$  and  $H_{3'}$   
8 must instead sum to at least  $2H$ . As  $d$  corresponds to  $H_{5'}$  (Fig 1), this can be  
9 expressed as:

10

11

$$H_{3'} \geq 2H - d$$

12

13 These two probabilities are important in defining  $p(e_D\{j\})$  in these experiments.  
14 However, as  $H$  is no longer negligible relative to  $C$ , the implicit assumption that  
15 any recombination modelled as extending beyond  $C$  is automatically curtailed at  
16 this maximum length is potentially problematic. It is alternatively possible that  
17 recombinations can lead to the exchange of  $j$  only if they successfully terminate  
18 within the boundaries of the donor DNA. The probability of a recombination  
19 terminating prior to reaching the end of the fragment requires the length of the  
20 recombination on the 3' side of  $j$ ,  $l_{3'}$ , to be both greater than  $H_{3'}$  and less than, or  
21 equal to,  $C/2$ :

22

$$p(H_{3'} \leq l_{3'} \leq \frac{C}{2}) = (1 - \lambda_R)^{H_{3'}} - (1 - \lambda_R)^{\frac{C}{2}}$$

23

24 These component probabilities can then be combined to give four different  
25 models, two of which assume  $H$  is balanced across  $j$ , and two of which assume the  
26 recombination must terminate within the boundaries of the donor fragment of  
27 length  $C$ .

28

29 1. **Balanced  $H$ , unterminated recombination**

30

1 Under this model, a recombination that deletes the region of heterology at locus  
 2  $j$ ,  $e_D\{j\}$ , must initiate at least  $H$  bases from  $j$ , and be able to span  $H$  bases on the  
 3 other side. Therefore  $e_D\{j\}$  requires  $H_{3'} \geq H$  and  $l_{3'} \geq H_{3'}$ :

4

$$5 \quad p(e_D\{j\}) \propto (1 - \lambda_R)^d (1 - \lambda_R)^H \text{ for } H \leq d \leq C/2$$

6

7 Under the condition  $C \geq 2H$ , this implies:

8

$$p(e_D\{j\} | C \geq 2H) \propto \sum_{d=H}^{C/2} (1 - \lambda_R)^{d+H}$$

9

10 The plotted values in Fig 3A correspond to a ratio of the frequency of successful  
 11 recombinations with a fragment of length  $f$  (corresponding to  $C$  in the above  
 12 relationships) relative to that same frequency with the fragment of the maximal  
 13 length,  $M$ , which was 2 kb in this experiment. The factor  $f/M$  was used to correct  
 14 for the number of DNA molecules available for transformation, because all  
 15 fragments were added at a concentration of  $60 \text{ ng } \mu\text{L}^{-1}$ , thereby assuming that  
 16 the competence system was not saturated by the amount of DNA substrate in the  
 17 transformation reaction. This appears accurate, based on the data for  
 18 transformations using  $100 \text{ ng } \mu\text{L}^{-1}$  and  $1000 \text{ ng } \mu\text{L}^{-1}$  donor DNA, as there was a  
 19 corresponding ten-fold increase in the number of observed transformants at the  
 20 elevated DNA concentration. Therefore, in order to fit this model to experimental  
 21 data, the ratio for the balanced  $H$  unterminated recombination model,  $y_{f,bu}$ , can be  
 22 expressed as:

23

$$y_{f,bu} = \frac{f \sum_{d=H}^{f/2} (1 - \lambda_R)^{d+H}}{M \sum_{d=H}^{M/2} (1 - \lambda_R)^{d+H}}$$

24

## 25 2. **Balanced $H$ , terminated recombination**

26

27 Under this model,  $e_D\{j\}$  requires a recombination initiating at least  $H$  bases from  
 28  $j$ , and both span  $H$  bases, and terminate prior to reaching  $C/2$  bases, from  $j$  on the  
 29 other side. Therefore  $e_D\{j\}$  requires  $H_{3'} \geq H$  and  $C/2 \geq l_{3'} \geq H_{3'}$ :

1

2

$$p(e_D\{j\}) \propto (1 - \lambda_R)^d [(1 - \lambda_R)^H - (1 - \lambda_R)^{C/2}]$$

3

$$\text{for } H \leq d \leq C/2$$

4

5 Which implies:

6

$$p(e_D\{j\} | C \geq 2H) \propto \sum_{d=H}^{C/2} [(1 - \lambda_R)^{d+H} - (1 - \lambda_R)^{d+\frac{C}{2}}]$$

7

8 With the DNA molecule ratio correction, this ratio for the balanced  $H$  terminated

9 recombination model,  $y_{f,bt}$ , for a fragment of length  $f$  relative to one of length  $M$

10 can therefore be expressed as:

11

$$y_{f,bt} = \frac{f \sum_{d=H}^{f/2} [(1 - \lambda_R)^{d+H} - (1 - \lambda_R)^{d+\frac{f}{2}}]}{M \sum_{d=H}^{M/2} [(1 - \lambda_R)^{d+H} - (1 - \lambda_R)^{d+\frac{M}{2}}]}$$

12

### 13 3. Unbalanced $H$ , unterminated recombination

14

15 Under this model,  $e_D\{j\}$  requires a recombination that initiates upstream of  $j$  and

16 at least  $2H$  bases from the distal end of the DNA fragment. Hence  $i$  may be either

17 directly adjacent to  $j$  if  $C/2 > 2H$ , or at least  $2H - C/2$  bases from  $j$ , if  $C/2 < 2H$ .

18 Therefore  $e_D\{j\}$  requires  $H_{3'} \geq 2H - d$  and  $l_{3'} \geq H_{3'}$ . Where  $d$  was greater than  $2H$ ,

19 then the recombination need only span from  $i$  to  $j$ :

20

21

$$p(e_D\{j\}) \propto (1 - \lambda_R)^d \text{ for } 2H \leq d \leq C/2$$

22

23 However, if  $d < 2H$ , then the recombination also needed to span  $H_{3'}$  bases on the

24 distal side of  $j$ , calculated as  $2H - d$ :

25

26

$$p(e_D\{j\} | C \geq 2H) \propto (1 - \lambda_R)^d (1 - \lambda_R)^{2H-d} \text{ for } \max(1, 2H - C/2) \leq d < 2H$$

27

1 This implies the combined probability of spanning  $d$  on the 5' side of  $j$  and  $2H-d$   
 2 on the 3' side of  $j$  is:

3

$$4 \quad p(e_D\{j\}|C \geq 2H) \propto (1 - \lambda_R)^{2H} \text{ for } \max(1, 2H-C/2) \leq d < 2H$$

5

6

7 Which implies an overall probability of:

8

$$p(e\{j\}|C \geq 2H) \propto \sum_{d=\max(1, 2H-\frac{C}{2})}^{2H-1} (1 - \lambda_R)^{2H} + \sum_{d=2H}^{C/2} (1 - \lambda_R)^d$$

9

10 With the DNA molecule ratio correction, the ratio of deletions with a fragment of  
 11 length  $f$  relative to those with a fragment of length  $M$  with the unbalanced  $H$   
 12 unterminated recombination model,  $y_{f,uu}$ , can therefore be expressed as:

13

$$y_{f,uu} = \frac{f \left[ \sum_{d=\max(1, 2H-\frac{f}{2})}^{2H-1} (1 - \lambda_R)^{2H} + \sum_{d=2H}^{\frac{f}{2}} (1 - \lambda_R)^d \right]}{M \left[ \sum_{d=\max(1, 2H-\frac{M}{2})}^{2H-1} (1 - \lambda_R)^{2H} + \sum_{d=2H}^{\frac{M}{2}} (1 - \lambda_R)^d \right]}$$

14

#### 15 4. Unbalanced $H$ , terminated recombination

16

17 Under this model,  $e_D\{j\}$  requires a recombination that initiates at least  $2H$  bases  
 18 from the distal end of the DNA fragment, which may be either directly adjacent to  
 19  $j$  if  $C/2 > 2H$ , or at least  $2H-C/2$  bases from  $j$ , if  $C/2 < 2H$ . The recombination must  
 20 also terminate prior to reaching the distal end of the DNA fragment. Therefore  
 21  $e_D\{j\}$  requires  $H_{3'} \geq 2H-d$  and  $C/2 \geq l_{3'} \geq H_{3'}$ . Where  $d$  was greater than  $2H$ , then the  
 22 recombination need only span from  $i$  to  $j$ , and terminate between  $j$  and the distal  
 23 end of  $f$ ,  $C/2$  bases away:

24

$$25 \quad p(e_D\{j\}|C \geq 2H) \propto (1 - \lambda_R)^d \left[ 1 - (1 - \lambda_R)^{\frac{C}{2}} \right] \text{ for } 2H \leq d \leq C/2$$

26

27 Which simplifies to:

1

$$2 \quad p(e_D\{j\}|C \geq 2H) \propto (1 - \lambda_R)^d - (1 - \lambda_R)^{d+\frac{C}{2}} \text{ for } 2H \leq d \leq C/2$$

3

4 However, if  $d < 2H$ , then the recombination also needed to span  $H_3'$  bases on the  
5 distal side of  $j$ , calculated as  $2H-d$ , and terminate prior to reaching the distal end  
6 of the DNA fragment:

7

$$p(e_D\{j\}|C \geq 2H) \propto (1 - \lambda_R)^d \left[ (1 - \lambda_R)^{2H-d} - (1 - \lambda_R)^{\frac{C}{2}} \right]$$

8 for  $\max(1, 2H-C/2) \leq d \leq 2H$

9

10 Which simplifies to:

11

$$12 \quad p(e_D\{j\}|C \geq 2H) \propto (1 - \lambda_R)^{2H} - (1 - \lambda_R)^{d+\frac{C}{2}} \text{ for } \max(1, 2H-C/2) \leq d \leq 2H$$

13

14 Which implies:

15

16

$$p(e_D\{j\}|C \geq 2H) \propto \sum_{d=\max(1, 2H-\frac{C}{2})}^{2H-1} \left[ (1 - \lambda_R)^{2H} - (1 - \lambda_R)^{d+\frac{C}{2}} \right] + \sum_{d=2H}^{\frac{C}{2}} \left[ (1 - \lambda_R)^d - (1 - \lambda_R)^{d+\frac{C}{2}} \right]$$

17

18 With the DNA molecule ratio correction, this ratio for the unbalanced  $H$   
19 terminated recombination model,  $y_{f,ut}$ , for a fragment of length  $f$  relative to one of  
20 length  $M$  can therefore be expressed as:

21

$y_{f,ut}$

$$= \frac{f}{M} \left[ \frac{\sum_{d=\max(1, 2H-\frac{f}{2})}^{2H-1} \left[ (1 - \lambda_R)^{2H} - (1 - \lambda_R)^{d+\frac{f}{2}} \right] + \sum_{d=2H}^{f/2} \left[ (1 - \lambda_R)^d - (1 - \lambda_R)^{d+\frac{f}{2}} \right]}{\sum_{d=\max(1, 2H-\frac{M}{2})}^{2H-1} \left[ (1 - \lambda_R)^{2H} - (1 - \lambda_R)^{d+\frac{M}{2}} \right] + \sum_{d=2H}^{M/2} \left[ (1 - \lambda_R)^d - (1 - \lambda_R)^{d+\frac{M}{2}} \right]} \right]$$

22

23

1 **Parameter estimation**

2 Data consisted of  $x_{j,f}$ , the frequency with which  $j$  is deleted with a fragment of  
3 length  $f$ ;  $x_{S,f}$ , the rate of SNP acquisition in the same experiment;  $\bar{x}_{j,M}$ , the mean  
4 frequency with which  $j$  is deleted with a fragment of length  $M$ , and  $\bar{x}_{S,M}$ , the mean  
5 rate of SNP acquisition in the same experiment. With the DNA molecule ratio  
6 correction, these were processed to generate a metric  $y_f$ :

7

$$y_f = \frac{f x_{j,f} \bar{x}_{S,M}}{M x_{S,f} \bar{x}_{j,M}}$$

8

9 The four models were fitted to data through minimising the square difference  
10 between the log transformed predicted and observed results. Model fitting used  
11 the 'maxSANN' function of the maxLik R package (Henningesen and Toomet  
12 2011). Fits were conducted on the overall dataset (Fig 3B) and the individual  
13 datasets (Fig S14) using the initial values of  $\lambda_l = 0.0005 \text{ bp}^{-1}$  and  $H = 250 \text{ bp}$   
14 (Table S1). Although  $y_f$  values of zero were kept for model fitting, this was  
15 substituted for an arbitrary value of  $7.5 \times 10^{-6}$  for plotting both experimental data  
16 and simulation outputs (Fig 3 & S14).

1 **Text S3: Models for deletion of heterologous DNA by unbalanced short**  
 2 **fragments**

3

4 The models described in Text S2 for the deletion of genomic islands by short  
 5 DNA fragments that span a locus  $j$  in a balanced manner can be modified to apply  
 6 to short DNA fragments that span  $j$  in an unbalanced manner. The length of the  
 7 fragment,  $C$ , can be split into a segment of unchanging length  $u$  on one side of  $j$ ,  
 8 and a segment of variable length  $v$  on the other side. The same four models as in  
 9 Text S2 can therefore be redefined in the following manner.

10

11 1. **Balanced  $H$ , unterminated recombination**

12

13 Based on the relationship defined in Text S2:

14

$$15 \quad p(e_D\{j\}) \propto (1 - \lambda_R)^d (1 - \lambda_R)^H \text{ for } H \leq d \leq u \text{ and } H \leq d \leq v$$

16

17 For a fragment in which both  $u$  and  $v$  are of length at least  $H$ , this implies:

18

$$19 \quad p(e_D\{j\} | u \geq H \cap v \geq H) \propto \sum_{d=H}^u (1 - \lambda_R)^{d+H} + \sum_{d=H}^v (1 - \lambda_R)^{d+H}$$

20

21 Denoting the maximum length of  $v$  as  $M$ , and adding a DNA molecule ratio  
 22 correction, the plotted ratio  $y_f$  for this balanced, unterminated model ( $y_{f,bu}$ , where  
 23  $f = u + v$ ) is therefore:

24

$$25 \quad y_{f,bu} = \frac{(u + v)}{(u + M)} \left[ \frac{\sum_{d=H}^u (1 - \lambda_R)^{d+H} + \sum_{d=H}^v (1 - \lambda_R)^{d+H}}{\sum_{d=H}^u (1 - \lambda_R)^{d+H} + \sum_{d=H}^M (1 - \lambda_R)^{d+H}} \right]$$

26

27 When plotted, this has an unusual form with an abrupt change in  $y_{f,bu}$ , where  $v =$   
 28  $H$  if  $u > v$ , as recombinations transition from being impossible to relatively  
 29 efficient at this boundary.

30

31 2. **Balanced  $H$ , terminated recombination**



1

2 Based on the relationship defined in Text S2:

3

$$4 \quad p(e_D\{j\}) \propto (1 - \lambda_R)^d [(1 - \lambda_R)^H - (1 - \lambda_R)^v]$$

$$5 \quad \text{for } H \leq d \leq u$$

6

$$7 \quad p(e_D\{j\}) \propto (1 - \lambda_R)^d [(1 - \lambda_R)^H - (1 - \lambda_R)^u]$$

$$8 \quad \text{for } H \leq d \leq v$$

9

10 Which implies:

11

$$p(e_D\{j\} | u \geq H \cap v \geq H) \propto \sum_{d=H}^u [(1 - \lambda_R)^{d+H} - (1 - \lambda_R)^{d+v}]$$

$$+ \sum_{d=H}^v [(1 - \lambda_R)^{d+H} - (1 - \lambda_R)^{d+u}]$$

12

13 With the DNA molecule ratio correction, the ratio  $y_{f,bt}$  can therefore be expressed

14 as:

15

$y_{f,bt}$

$$= \frac{(u + v)}{(u + M)} \left[ \frac{\sum_{d=H}^u [(1 - \lambda_R)^{d+H} - (1 - \lambda_R)^{d+v}] + \sum_{d=H}^v [(1 - \lambda_R)^{d+H} - (1 - \lambda_R)^{d+u}]}{\sum_{d=H}^u [(1 - \lambda_R)^{d+H} - (1 - \lambda_R)^{d+M}] + \sum_{d=H}^M [(1 - \lambda_R)^{d+H} - (1 - \lambda_R)^{d+u}]} \right]$$

16

### 17 3. Unbalanced $H$ , unterminated recombination

18

19 Based on the relationship defined in Text S2:

20

$$21 \quad p(e_D\{j\}) \propto (1 - \lambda_R)^d \text{ for } 2H \leq d \leq u \text{ and } 2H \leq d \leq v$$

22

23 And:

24

$$25 \quad p(e_D\{j\}) \propto (1 - \lambda_R)^d (1 - \lambda_R)^{2H-d}$$

1 for  $\max(1, 2H-u) \leq d \leq 2H$  and  $\max(1, 2H-v) \leq d \leq 2H$

2

3 Which simplifies to:

4

5  $p(e_D\{j\}) \propto (1 - \lambda_R)^{2H}$  for  $\max(1, 2H-u) \leq d \leq 2H$  and  $\max(1, 2H-v) \leq d \leq 2H$

6

7 Which implies:

8

$$p(e_D\{j\} | (u+v) \geq 2H) \propto \sum_{d=\max(1, 2H-v)}^{d=2H-1} (1 - \lambda_R)^{2H} + \sum_{d=2H}^{d=u} (1 - \lambda_R)^d \\ + \sum_{d=\max(1, 2H-u)}^{d=2H-1} (1 - \lambda_R)^{2H} + \sum_{d=2H}^{d=v} (1 - \lambda_R)^d$$

9

10 With the DNA molecule ratio correction, the ratio  $y_{f,uu}$ , can therefore be

11 expressed as:

12

$y_{f,uu}$

$$= \frac{(u+v)}{(u+M)} \left[ \frac{\sum_{d=\max(1, 2H-v)}^{2H-1} (1 - \lambda_R)^{2H} + \sum_{d=2H}^u (1 - \lambda_R)^d + \sum_{d=\max(1, 2H-u)}^{2H-1} (1 - \lambda_R)^{2H} + \sum_{d=2H}^v (1 - \lambda_R)^d}{\sum_{d=\max(1, 2H-M)}^{2H-1} (1 - \lambda_R)^{2H} + \sum_{d=2H}^u (1 - \lambda_R)^d + \sum_{d=\max(1, 2H-u)}^{2H-1} (1 - \lambda_R)^{2H} + \sum_{d=2H}^M (1 - \lambda_R)^d} \right]$$

13

#### 14 4. Unbalanced $H$ , terminated recombination

15

16 Based on the relationship defined in Text S3:

17

18  $p(e_D\{j\}) \propto (1 - \lambda_R)^d [1 - (1 - \lambda_R)^v]$  for  $2H \leq d \leq u$

19

20  $p(e_D\{j\}) \propto (1 - \lambda_R)^d [1 - (1 - \lambda_R)^u]$  for  $2H \leq d \leq v$

21

22 And:

23

$$p(e_D\{j\}) \propto (1 - \lambda_R)^d [(1 - \lambda_R)^{2H-d} - (1 - \lambda_R)^v]$$

24

for  $\max(1, 2H-v) \leq d < 2H$

25

$$p(e_D\{j\}) \propto (1 - \lambda_R)^d [(1 - \lambda_R)^{2H-d} - (1 - \lambda_R)^u]$$

1 for  $\max(1, 2H-u) \leq d < 2H$

2

3 Which implies:

4

5  $p(e_D\{j\} | (u + v) \geq 2H) \alpha$

$$\begin{aligned} & \sum_{d=\max(1, 2H-v)}^{2H-1} [(1 - \lambda_R)^{2H} - (1 - \lambda_R)^{d+v}] + \sum_{d=2H}^u [(1 - \lambda_R)^d - (1 - \lambda_R)^{d+v}] \\ & + \sum_{d=\max(1, 2H-u)}^{2H-1} [(1 - \lambda_R)^{2H} - (1 - \lambda_R)^{d+u}] \\ & + \sum_{d=2H}^v [(1 - \lambda_R)^d - (1 - \lambda_R)^{d+u}] \end{aligned}$$

6

7 With the DNA molecule ratio correction, the ratio  $y_{f,ut}$  can therefore be expressed

8 as:

9

$y_{f,ut}$

$$= \frac{(u + v) \left[ (u + v) \sum_{d=\max(1, 2H-v)}^{2H-1} [(1 - \lambda_R)^{2H} - (1 - \lambda_R)^{d+v}] + \sum_{d=2H}^u [(1 - \lambda_R)^d - (1 - \lambda_R)^{d+v}] + \sum_{d=\max(1, 2H-u)}^{2H-1} [(1 - \lambda_R)^{2H-d} - (1 - \lambda_R)^{d+u}] + \sum_{d=2H}^v (1 - \lambda_R)^d \right]}{(u + M) \left[ (u + M) \sum_{d=\max(1, 2H-M)}^{2H-1} [(1 - \lambda_R)^{2H} - (1 - \lambda_R)^{d+M}] + \sum_{d=2H}^M [(1 - \lambda_R)^d - (1 - \lambda_R)^{d+M}] + \sum_{d=\max(1, 2H-u)}^{2H-1} [(1 - \lambda_R)^{2H-d} - (1 - \lambda_R)^{d+u}] + \sum_{d=2H}^M (1 - \lambda_R)^d \right]}$$

10

## 11 Parameter estimation

12 Parameters were estimated as described in Text S2.

1 **Text S4: Genetic constructs used in the transformation assays**

2

3 **Construction of *S. pneumoniae* R6I**

4 *S. pneumoniae* R6x (Tiraby and Fox 1973) was first transformed with an *rpsL*\*  
5 allele containing a spontaneous streptomycin resistance mutation, followed by  
6 selection on 100 µg mL<sup>-1</sup> streptomycin sulphate (Sigma-Aldrich). To  
7 simultaneously remove the phase variable *ivr* restriction modification locus  
8 (Croucher et al. 2014) and introduce ICESp23FST81 (Croucher et al. 2009), 1 kb  
9 sequences flanking the R6x *ivr* locus were amplified by PCR using RedTaq  
10 (Sigma-Aldrich), according to manufacturer's instructions, and primers *ivr*.LL,  
11 *ivr*.CRA, *ivr*.CL and *ivr*.RR (Invitrogen; Table S2) at a final concentration of 10  
12 µM. The Janus cassette (Sung et al. 2001) was amplified using *Jns*.F and *Jns*.R  
13 (Invitrogen) and purified through agarose gel electrophoresis and the GenElute  
14 Gel Extraction Kit (Sigma-Aldrich). Five hundred nanograms of each amplicon  
15 was digested with *Apa*I (Promega) (*ivr*.LL-*ivr*.CRA), *Bam*HI (Promega) (*ivr*.CL-  
16 *ivr*.RR), or both (Janus cassette) for two hours at 37°C, followed by 15 min at  
17 65°C to deactivate the enzymes. Five microlitres of each of the three DNA  
18 fragments were ligated using T4 DNA ligase (Invitrogen) at 25°C for two hours,  
19 followed by 15 minutes of ligase deactivation at 74°C. The full construct was  
20 amplified and purified, then used to transform *S. pneumoniae* R6x *rpsL*\*.  
21 Candidate *ivr*::Janus mutants were selected on 400 µg mL<sup>-1</sup> kanamycin sulphate  
22 (Sigma-Aldrich), and verified through PCR and testing streptomycin sensitivity.

23

24 Transconjugation of ICESp23FST81 required filter mating through concentrating  
25 1 mL stationary phase culture samples of ATCC 700669 and R6x *rpsL*\* *ivr*::Janus  
26 onto a 0.45 µm pore MF membrane filter (Sigma-Aldrich). The filter was  
27 incubated for 24 h at 35°C on a non-selective THY agar plate containing 5%  
28 defibrinated horse blood (E&O Laboratories) while covered with CAT-THY agar  
29 (Shoemaker et al. 1980) containing 50 µL DNase I (New England Biolabs).  
30 Candidate transconjugants were selected from the cell mass through 48 h  
31 incubation on THY agar containing 400 µg mL<sup>-1</sup> kanamycin sulphate and 10 µg  
32 mL<sup>-1</sup> tetracycline hydrochloride (Sigma-Aldrich). Sensitivity to streptomycin,  
33 colony morphology and PCR genotyping were used to verify candidates

1 represented the insertion of ICESp23FST81 at the *att<sub>rplL</sub>* site in R6x *rpsL*\*

2 *ivr::*]Janus.

3

4 To remove the Janus cassette, the same regions flanking the *ivr* locus were  
5 amplified as previously, except primer *ivr.CRB* was used instead of *ivr.CRA*. The  
6 two DNA fragments were digested using BamHI, ligated, and the full construct  
7 amplified by PCR and purified. This construct was used to transform *S.*

8 *pneumoniae* R6x *rpsL*\* *ivr::*]Janus *att<sub>rplL</sub>::*[ICESp23FST81] and candidate colonies  
9 selected using 100 µg mL<sup>-1</sup> streptomycin sulphate. Removal of Janus was verified  
10 by PCR and testing kanamycin sensitivity. This final *S. pneumoniae* R6x *rpsL*\*  $\Delta$ *ivr*  
11 *att<sub>rplL</sub>::*[ICESp23FST81] genotype contained a substantial insertion, hence was  
12 renamed R6I.

13

#### 14 **Construction of R6I derivatives**

15 The *ermB* gene was amplified from *S. pneumoniae* 11930 (Croucher et al. 2011)  
16 using primers *ermB.LA* and *ermB.RB* (Table S2) and ligated between two halves  
17 of the *tetM* gene from ICESp23FST81, amplified using primers *tet.LL*, *tet.CRA* and  
18 *tet.CLB*, *tet.RR*. The construct was then used to transform R6I to produce strain  
19 R6I *tetM::ermB* (R6I-1*i*). A second strain was derived from R6I *tetM::ermB*  
20 through transformation with a construct consisting of the 5' end of *tetM*  
21 (primers: *tet.LL*, *tet.CRA*), the *aph3'* gene amplified from the genome of *S.*  
22 *pneumoniae* TIGR4 $\Delta$ *cps* (Pearce et al. 2002) (primers: *kan.L*, *kan.R*), and the  
23 *ermB* gene (primers: *ermB.LB*, *ermB.R*). The consequent R6I *tetM::*[*aph3'*, *ermB*]  
24 strain (R6I-2*i*) was isolated following selection with kanamycin sulphate. *S.*  
25 *pneumoniae* R6I itself therefore served as R6I-1*d* and R6I-2*d*.

26

27 A modified *ermB* construct was used for the preparation of genotypes for *L*  
28 greater than 2 kb, with one different homologous arm (generated with primers  
29 2A and 2B) used to remove of the 5' half of *tetM*, generating the tetracycline-  
30 sensitive R6I  $\Delta$ *tetM*<sub>5'</sub> *ermB*. The 5' half of *tetM* was amplified from R6I with  
31 primers *tet.LLX* and *tet.CRA*, then ligated to the *aph3'* gene, amplified from the  
32 genome of *S. pneumoniae* TIGR4 $\Delta$ *cps* (Pearce et al. 2002) with primers *kan.L* and  
33 *kan.R*. The resultant construct ('TK') was used to prepare six constructs that

1 were used to introduce the 5' half of *tetM* at different positions upstream of its  
2 original location. In each case, 2 kb genomic regions located at increasing  
3 distances from the 3' half of the *tetM* gene (tet.CLB binding site) were amplified  
4 as 1 kb fragments, which were ligated to either end of the TK construct using  
5 *XbaI* and *BamHI* restriction sites added using the relevant primers (Table S2).  
6 The resulting six TK-based constructs were used to transform R6I  $\Delta tetM_5'$  *ermB*  
7 to generate R6I *tetM*::[*aph3'*, *ermB*, *L*] strains, where *L* is the length of the  
8 sequence separating the two halves of the *tetM* gene (including the *ermB* and  
9 *aph3'* genes themselves), corresponding to the R6I-*Li* genotypes.

10

11 For each of these, the insertions flanked by *aph3'* and *ermB* were removed by  
12 transforming the R6I *tetM*::[*aph3'*, *ermB*, *L*] strain with the *tetM* sequence  
13 amplified from R6I using primers tetM.L and tetM.R, followed by selection on 10  
14  $\mu\text{g mL}^{-1}$  tetracycline hydrochloride. These experiments generated the strains R6I  
15  $\Delta L$ , where *L* is the length of the insert removed, corresponding to the R6I-*Ld*  
16 genotypes. For each R6I *tetM*::[*aph3'*, *ermB*, *L*] and R6I  $\Delta L$  strain, rifampicin-  
17 resistant mutants were generated through transformation with a PCR amplicon  
18 of a *rpoB*<sub>S482F</sub> allele. This was generated with primers rpoB.L and rpoB.R from a  
19 spontaneous mutant in which a C→T base substitution caused a S482F amino  
20 acid substitution. Selection of transformants used THY agar plates supplemented  
21 with 4  $\mu\text{g mL}^{-1}$  rifampicin (Alfa Aesar). Genomic DNA (gDNA) was extracted from  
22 these R6I *tetM*::[*aph3'*, *ermB*, *L*] *rpoB*<sub>S482F</sub> and R6I  $\Delta L$  *rpoB*<sub>S482F</sub> strains using the  
23 Wizard Genomic DNA Purification Kit (Promega).

24

### 25 **Fragments of *tetM* used in transformation assays**

26 To quantify the rate of deletion with *tetM* fragments of different lengths, R6I-*Li*  
27 genotypes were transformed with PCR amplicons using the approach described  
28 for the gDNA transformations. Each *tetM* fragment was amplified with the  
29 primers indicated in Fig S13 and Table S2 according to the experimental design,  
30 gel purified with the GenElute Gel Extraction kit (Sigma-Aldrich), and  
31 standardised at a concentration of 60 ng  $\mu\text{L}^{-1}$ . Similarly, gDNA from a rifampicin-  
32 resistant *S. pneumoniae* TIGR4 $\Delta cps$  genotype (Pearce et al. 2002) was extracted  
33 and diluted to 60 ng  $\mu\text{L}^{-1}$ . Five microliters of a ten-fold dilution of the appropriate

- 1 *tetM* fragment, and the rifampicin-resistance encoding gDNA, were each added to
- 2 the 1 mL transformation. Of this volume, 10  $\mu\text{L}$  was spread on THY plates with 4
- 3  $\mu\text{g mL}^{-1}$  rifampicin, to count colonies to calculate  $e\{S\}$ , and between 100 and 900
- 4  $\mu\text{L}$  spread on THY plates supplemented with 10  $\mu\text{g mL}^{-1}$  tetracycline
- 5 hydrochloride, to count colonies to quantify  $e_D\{j\}$ .

1 **Supplementary Figures**

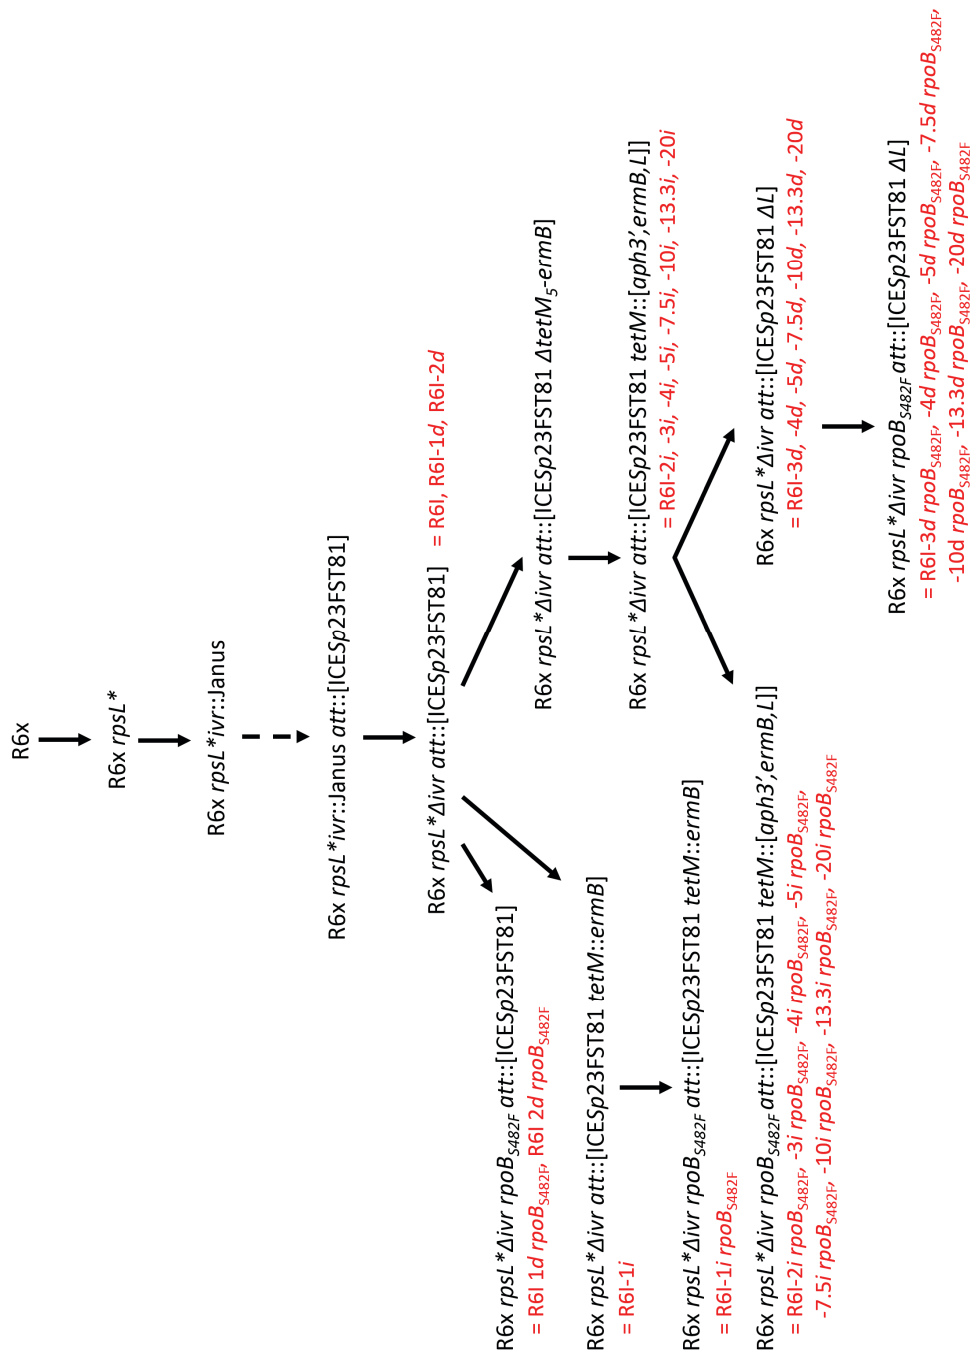

2

3 **Figure S1** – Construction of the genotypes used in this study. This diagram  
 4 shows the stages by which the genotypes used in the described experiments  
 5 were generated from the progenitor *S. pneumoniae* R6x strain. The names in red  
 6 are those used in the main text; those in black are the formal genotype  
 7 descriptions. Solid or dashed arrows indicate that the relevant strain was  
 8 produced via transformation or transconjugation, respectively.



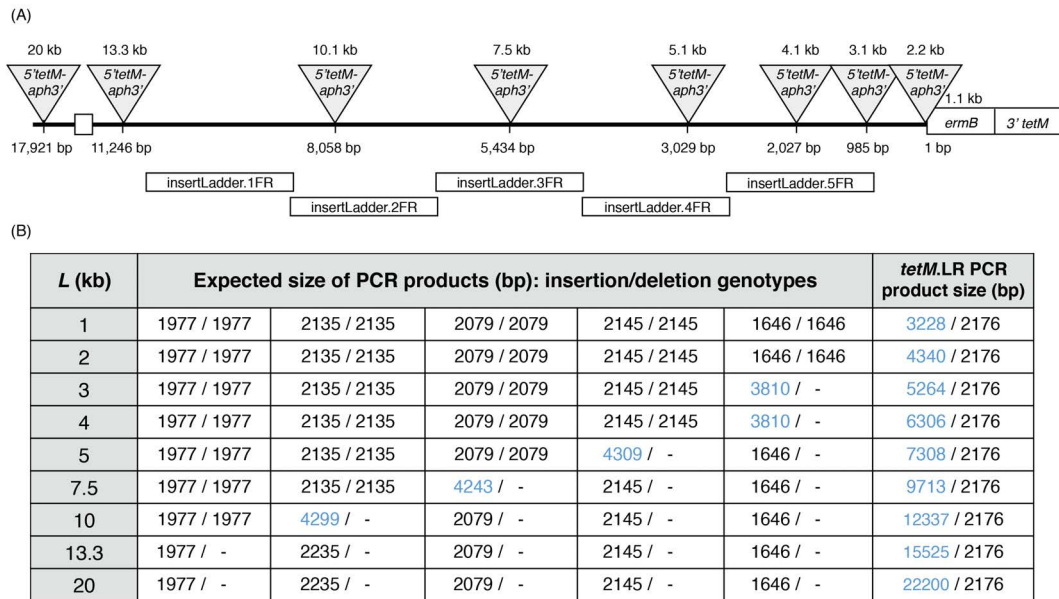

1  
2 **Figure S2** – PCR scheme for genotype validation. (A) Diagram showing the  
3 extent of PCR amplicons. The solid bar indicates the region of ICES<sub>p23FST81</sub>  
4 involved in the insertion and deletion experiments. The positioning of different  
5 ‘insertLadder’ primer pairs, listed as separate forward (‘F’) and reverse (‘R’)  
6 primers in Table S2, relative to the 5’ end of *ermB* is indicated under the bar by  
7 white rectangles. The grey triangles and numbers indicate the position of the  
8 *tetM*<sub>5</sub>-*aph3*’ insertions in the different R6I-*Li* strains, again relative to the 5’ end  
9 of *ermB*. (B) Five of the columns in the table correspond to the five insertLadder  
10 primer pairs in the panel above. Each row corresponds to a particular *L*. Within  
11 each cell, the two numbers are the predicted PCR amplicon sizes for the  
12 corresponding pair of R6I-*Li* and R6I-*Ld* strains. All PCRs used an elongation  
13 time of two minutes; therefore products greater than 2.2 kb were not always  
14 amplified and are marked in blue. Dashes indicate PCRs that were not expected  
15 to yield a band. The rightmost column shows predicted sizes of amplicons  
16 amplified using the *tetM*.LR primer pair, but does not directly correspond to the  
17 panel above.

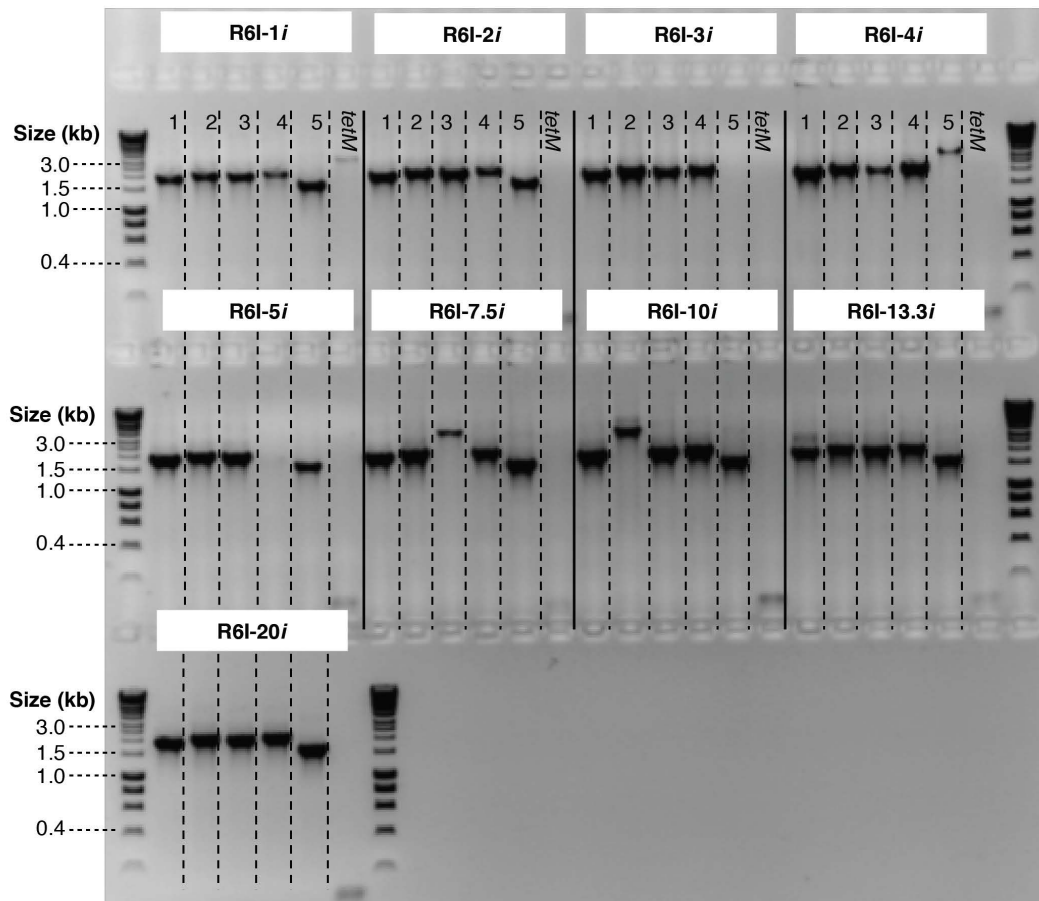

1  
2 **Figure S3** – Validating the construction of R6I-*Li* genotypes. As described in Fig  
3 S1, strains 2*i*, 3*i*, 4*i*, 5*i*, 7.5*i*, 10*i*, 13.3*i* and 20*i* were generated by transforming  
4 R6x *rpsL*\**Δivr att<sub>rplL</sub>*::[ICESp23FST81] with *aph3*'- and *ermB*-containing  
5 constructs. Strain 1*i* was generated through the insertion of *ermB* only into the  
6 same background. The identity of the R6I-*Li* candidates was confirmed by  
7 running a set of validation PCRs on their genomic DNA (Fig S2), using primers  
8 insertLadder.1FR ('1'), insertLadder.2FR ('2'), insertLadder.3FR ('3'),  
9 insertLadder.4FR ('4'), insertLadder.5FR ('5'), and tetM.LR ('tetM'), the products  
10 of which were visualised on 1% agarose gel. Each lane contains 5 μL of PCR  
11 product or Hyperladder 1kb (Bioline), used as a DNA size marker. The PCR  
12 products correspond to the predicted sizes shown in Fig S2, confirming the  
13 presence of the expected lengths of DNA following transformation with the  
14 respective *aph3*' and *ermB* constructs.

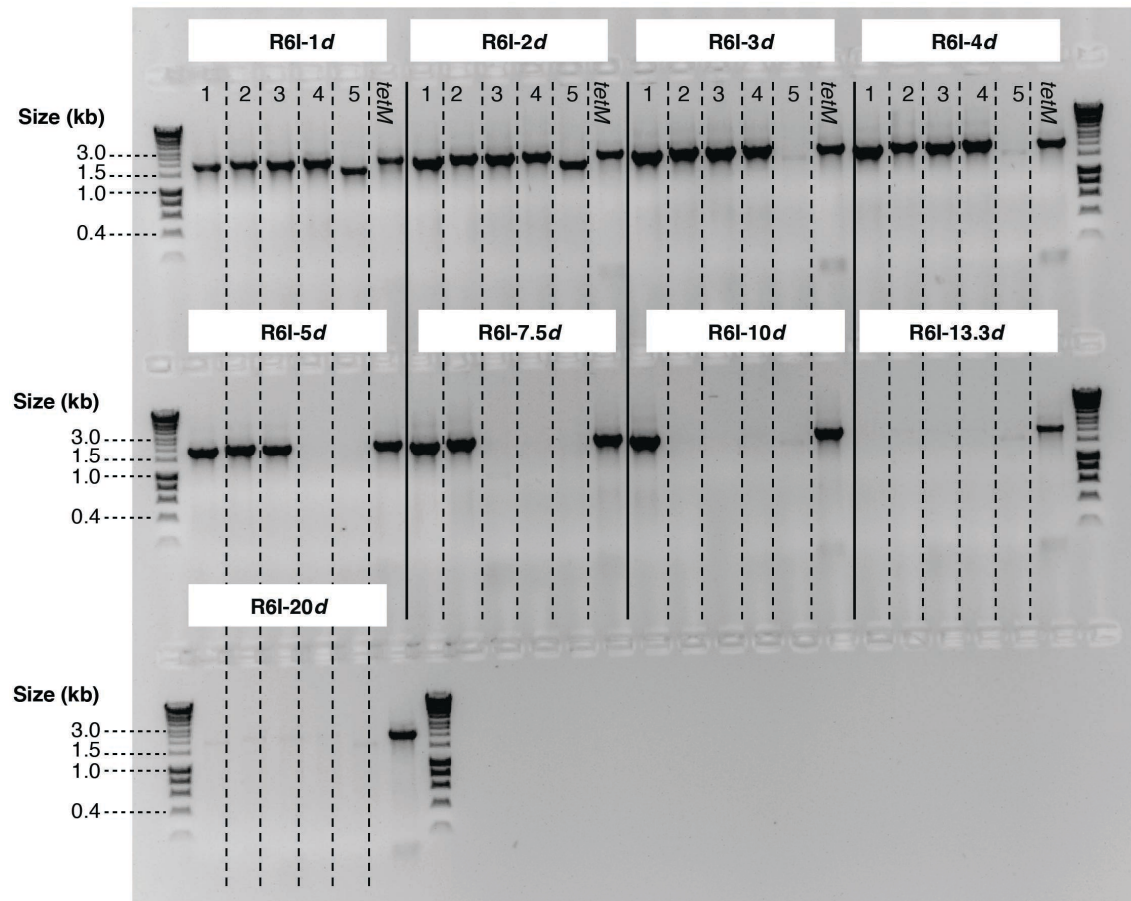

1  
 2 **Figure S4** – Validating the construction of R6I-*Ld* genotypes. As described in Fig  
 3 S1, strain R6I served as R6I-1*d* and R6I-2*d*. Strains R6I-3*d*, 4*d*, 5*d*, 7.5*d*, 10*d*,  
 4 13.3*d* and 20*d* were generated by transforming the corresponding R6x *rpsL*\* $\Delta$ *ivr*  
 5 *att<sub>rplL</sub>::[ICESp23FST81 tetM::[aph3',ermB,L]]* genotype with the tetM.LR PCR  
 6 product. These transformations aimed to remove *L* kb DNA inserted between the  
 7 two halves of the *tetM* gene. The genotypes of these R6I-*Ld* candidates was  
 8 verified by running a set of validation PCRs on their genomic DNA (Fig S2), using  
 9 primer pairs insertLadder.1FR ('1'), insertLadder.2FR ('2'), insertLadder.3FR  
 10 ('3'), insertLadder.4FR ('4'), insertLadder.5FR ('5'), and tetM.LR (*tetM*). The  
 11 figure shows a 1% agarose gel in which each lane contains 5  $\mu$ L of PCR product  
 12 or DNA size marker Hyperladder 1kb (Bioline). As the PCR products correspond  
 13 to the predicted sizes outlined in Fig S2, confirming that the *L* kb of DNA  
 14 originally separating the two halves of *tetM* were removed successfully. These  
 15 strains were used as recipients in experiments shown in Fig 2.

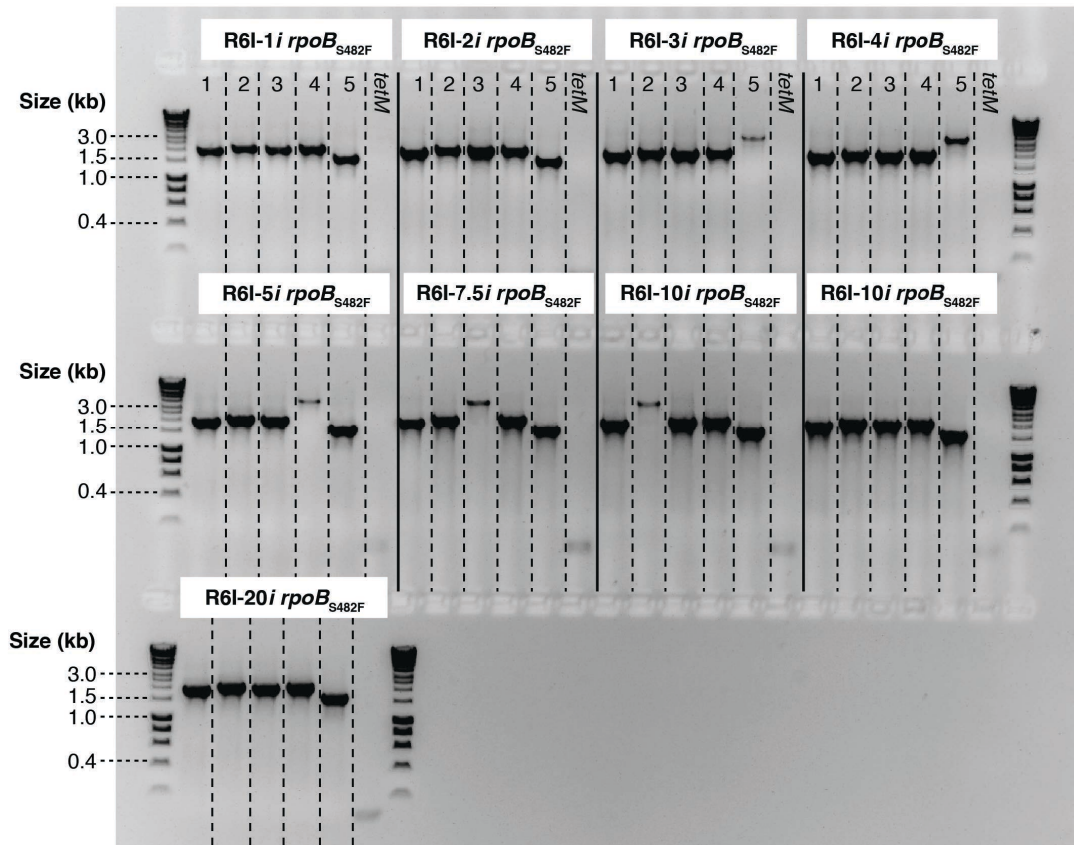

1  
2 **Figure S5** - Validating the construction of R61-*Li rpoB*<sub>S482F</sub> genotypes. The R61-*Li*  
3 strains were transformed with the PCR amplified rifampicin resistance allele of  
4 *rpoB* (*rpoB*<sub>S482F</sub>) with primers rpoB.L and rpoB.R. Genomic DNA was extracted  
5 from these strains for the transformation experiments described in Fig 1. To  
6 verify no changes had occurred in the ICESp23FST81 region, validation PCRs  
7 using primer pairs insertLadder.1FR ('1'), insertLadder.2FR ('2'),  
8 insertLadder.3FR ('3'), insertLadder.4FR ('4'), insertLadder.5FR ('5'), and  
9 tetM.LR ('tetM') were run. Hyperladder 1kb was used as a DNA size marker on  
10 this 1% agarose gel. Each lane contains 5 μL of PCR product or Hyperladder 1kb.  
11 The PCR products correspond to the predicted sizes shown in Fig S2, confirming  
12 that no detectable changes had occurred to the ICESp23FST81 region of the  
13 strains.

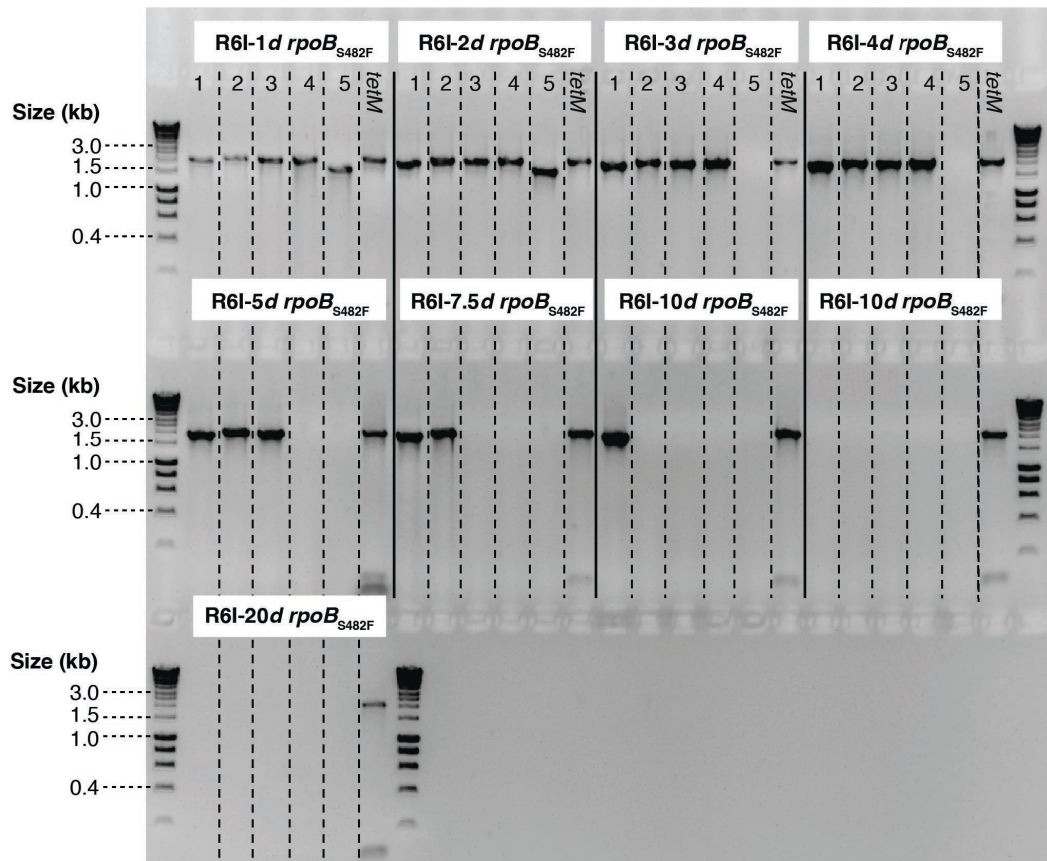

1  
2 **Figure S6** - Validating the construction of R6I-*Ld rpoB*<sub>S482F</sub> genotypes. The R6I-  
3 *Ld* strains were transformed with the PCR amplified rifampicin resistance-  
4 conferring allele of *rpoB* (*rpoB*<sub>S482F</sub>) with primers *rpoB*.L and *rpoB*.R. Genomic  
5 DNA was extracted from these strains for the transformation experiments  
6 described in Fig 1. To verify no changes had occurred in the ICES<sub>p23FST81</sub>  
7 region, validation PCRs using primers insertLadder.1FR ('1'), insertLadder.2FR  
8 ('2'), insertLadder.3FR ('3'), insertLadder.4FR ('4'), insertLadder.5FR ('5'), and  
9 tetM.LR ('tetM') were run. Hyperladder 1kb was used as a DNA size marker on  
10 this 1% agarose gel. Each lane contains 5 µL of PCR product or Hyperladder 1kb.  
11 The PCR products correspond to the predicted sizes shown in Fig S2, confirming  
12 that no detectable changes had occurred to the ICES<sub>p23FST81</sub> region of the  
13 strains.  
14

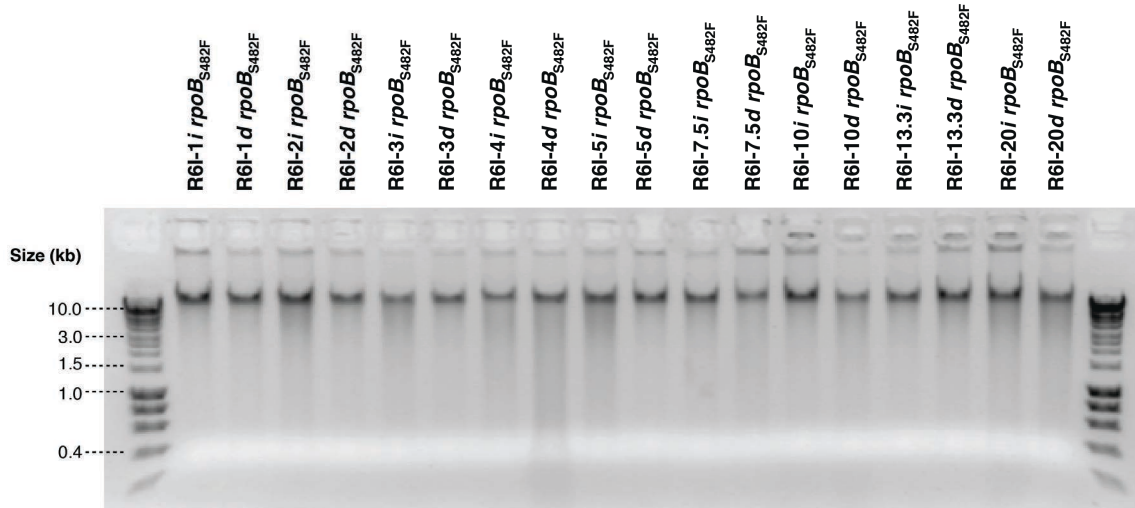

1  
2  
3  
4  
5  
6  
7  
8  
9

**Figure S7** – Genomic DNA from R61-*Li* and R61-*Ld* genotypes used for transformation. Genomic DNA (5  $\mu$ L) was visualised on 1% agarose gel relative to 5  $\mu$ L Hyperladder 1kb used as a DNA size marker. This shows the concentrations of the genomic DNA samples after standardisation using electrophoresis and the NanoDrop 1000 spectrophotometer. The distribution of fragment sizes demonstrates the DNA had not undergone substantial degradation into small fragments prior to the experiments.

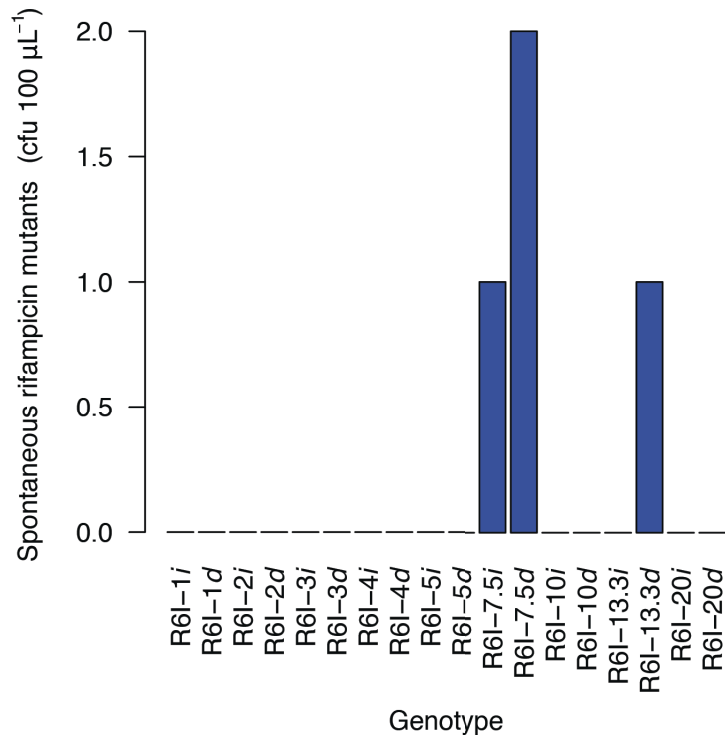

1  
2  
3  
4  
5  
6  
7  
8  
9  
10  
11  
12  
13

**Figure S8** – Contribution of spontaneous mutation to rifampicin resistance. Each genotype was subject to a mock transformation, without donor DNA, and 100  $\mu\text{L}$  plated on THY agar plates supplemented with rifampicin. Colonies were counted as a measure of the contribution of spontaneous mutation to the observed frequency of rifampicin-resistant colonies, used to infer  $e\{S\}$ . The absence of spontaneous mutants from most plates, and the low frequency in others, suggests this process has little effect on the results relative to the rate with which recipients were transformed with the  $rpoB_{S482F}$  allele. Hence this process should not have much effect on estimates of  $e\{S\}$ , as this study only included experiments in which at least 250 rifampicin-resistant transformants per millilitre were estimated to be present.

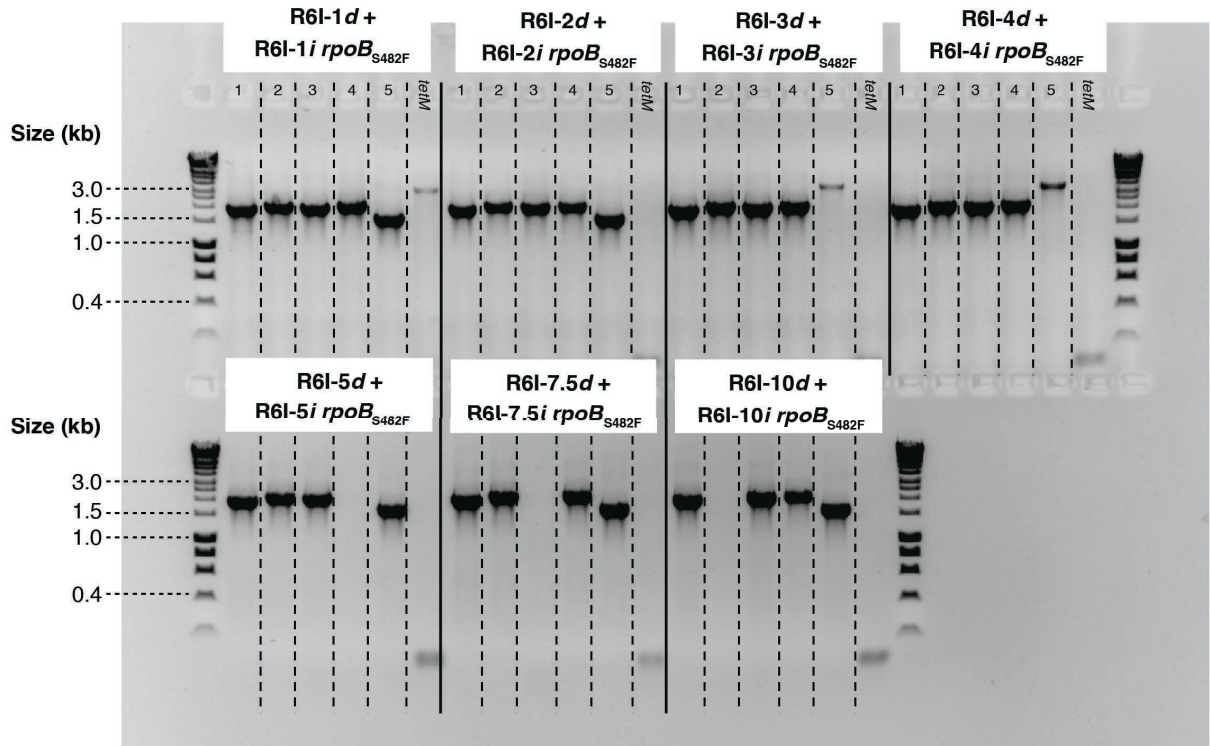

1

2 **Figure S9** – Validating the specificity of erythromycin selection for acquisition of  
3 the *L* kb segments. R6I-*Ld* strains were transformed with genomic DNA extracted  
4 from the respective R6I-*Li* *rpoB*<sub>S482F</sub> strains, then subject to selection on THY  
5 agar plates containing 1 µg mL<sup>-1</sup> erythromycin. To ensure this selection was  
6 specific for recombinations that inserted all the intervening DNA between the  
7 two halves of the *tetM* gene, all erythromycin-resistant colonies from a particular  
8 transformation were cultured in a single 10 mL THY broth culture, from which  
9 genomic DNA was extracted, and used as the template for validation PCRs (Fig  
10 S2). These reactions used primer pairs insertLadder.1FR ('1'), insertLadder.2FR  
11 ('2'), insertLadder.3FR ('3'), insertLadder.4FR ('4'), insertLadder.5FR ('5'), and  
12 tetM.LR (*tetM*). Hyperladder 1kb (Bioline) was used as a DNA size marker. Each  
13 lane contains 5 µL of PCR product or Hyperladder 1kb. The PCR products  
14 correspond to the predicted sizes for R6I-*Li* strains shown in Fig S2, with no false  
15 positive products from intact *tetM* genes found in the untransformed R6I-*Ld*  
16 recipient strains, confirming that erythromycin selection had high specificity for  
17 recombinants. In this experiment, no erythromycin-resistant colonies were  
18 observed following transformation of either R6I-13.3d or R6I-20d, therefore the  
19 no results for these values of *L* are shown.

20



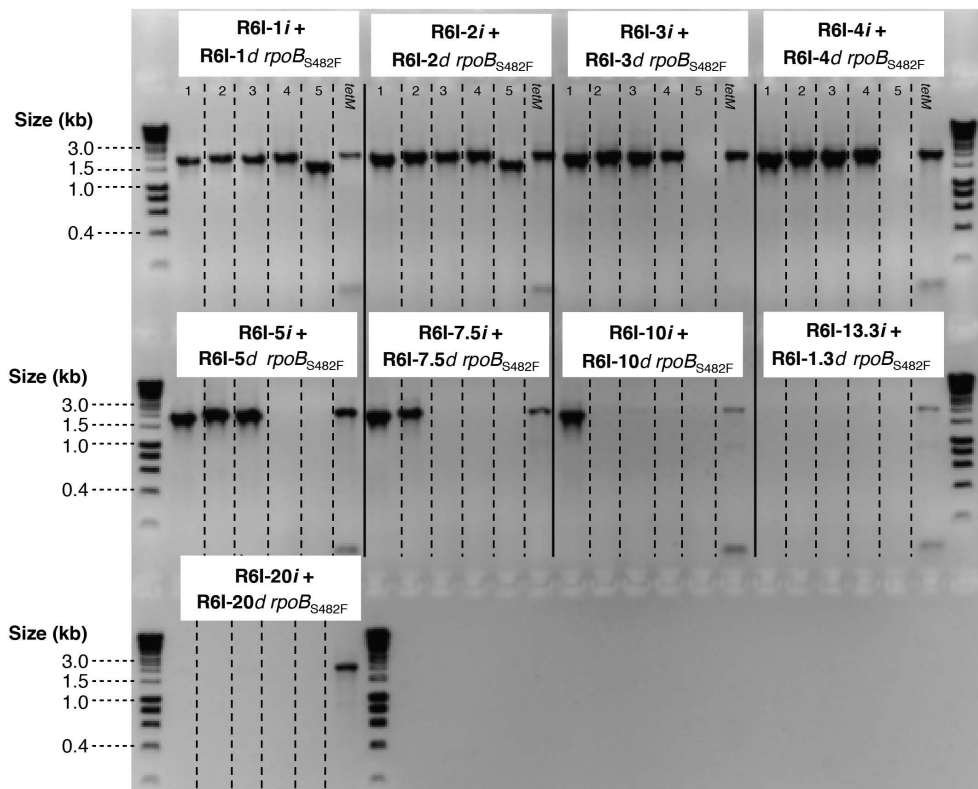

1  
 2 **Figure S10** – Validating the specificity of tetracycline selection for removal of the  
 3 *L* kb segments. R6I-*Li* strains were transformed with genomic DNA extracted  
 4 from the respective R6I-*Ld rpoB*<sub>S482F</sub> strains, and then subject to selection on THY  
 5 agar plates containing 10 µg mL<sup>-1</sup> tetracycline. To ensure this selection was  
 6 specific for recombinations that removed all the intervening DNA between the  
 7 two halves of the *tetM* gene, all tetracycline-resistant colonies from a particular  
 8 transformation were cultured in a single 10 mL THY broth culture, from which  
 9 genomic DNA was extracted, and used as the template for validation PCRs (Fig  
 10 S2). These reactions used primer pairs insertLadder.1FR ('1'), insertLadder.2FR  
 11 ('2'), insertLadder.3FR ('3'), insertLadder.4FR ('4'), insertLadder.5FR ('5'), and  
 12 tetM.LR (*tetM*). Hyperladder 1kb (Bioline) was used as a DNA size marker. Each  
 13 lane contains 5 µL of PCR product or Hyperladder 1kb. The PCR products  
 14 correspond to the predicted sizes shown in Fig S2 for R6I-*Ld* strains, with no  
 15 false positive products from the DNA between the two *tetM* halves found in the  
 16 untransformed recipient R6I-*Li* strains, confirming that tetracycline selection  
 17 had high specificity for recombinants.  
 18

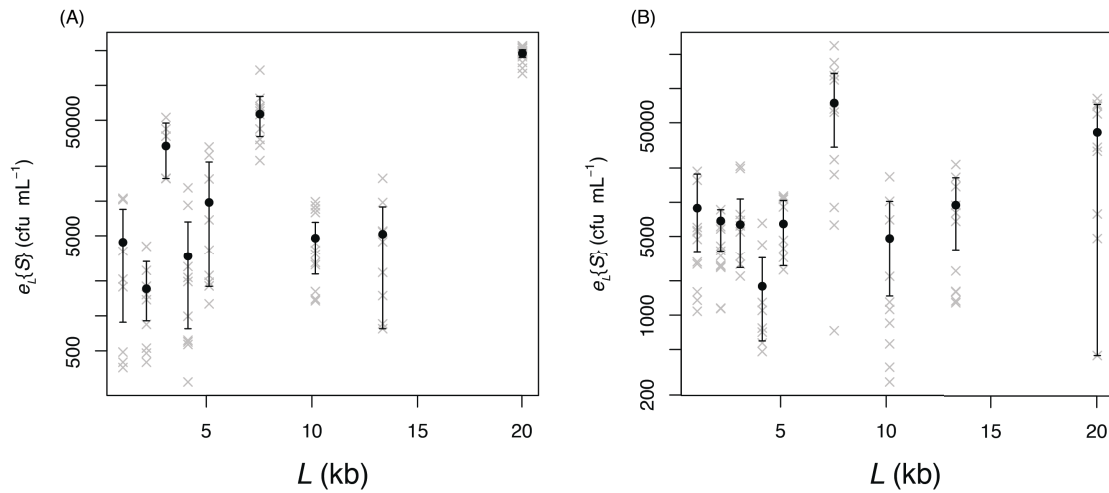

1  
2  
3  
4  
5  
6  
7  
8  
9  
10  
11

**Figure S11** – Variation in transformation rates between genotypes. (A) Variation in transformability between R6I-*Li* genotypes. Each cross represents an estimated  $e\{S\}$  measurement based on counts of rifampicin-resistant mutants from the experiments shown in Fig 2A.  $L$  denotes the length of heterology in the genotype. Each point represents the  $\tau_g$  estimate from the model fit shown in Fig 2A. The error bars span the full range of  $\tau_g$  estimates across the 100 bootstrap replicates. (B) Variation in transformability between R6I-*Ld* genotypes, shown as for panel (A), based on counts of rifampicin-resistant mutants from the experiments shown in Fig 2B.

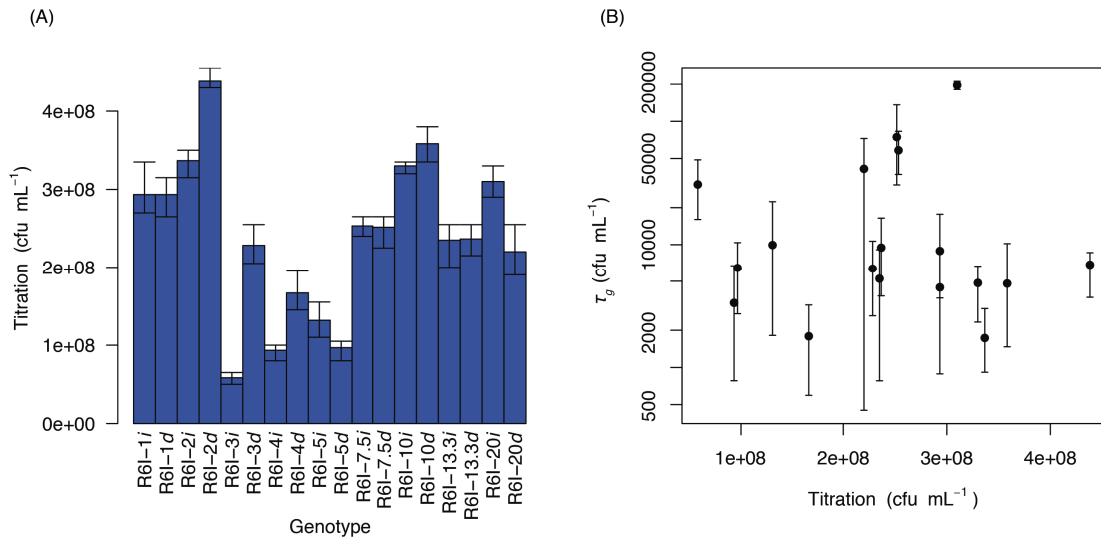

1  
2  
3  
4  
5  
6  
7  
8  
9  
10  
11

**Figure S12** – Growth density of genotypes. Triplicate mock transformations, lacking donor DNA, were performed for each genotype, and the total cell density estimated by live cell count titration 3 h post-transformation. (A) Bar plot of cell densities. The bars shows the mean estimate, with an error bar indicating the range between maximum and minimum cell counts. (B) Relationship with genotype transformability. The total cell count was plotted against the  $\tau_g$  estimates and associated uncertainty estimates in Fig S11. The lack of correlation demonstrates the variation in  $e\{S\}$  is not explained by differences in growth rates between genotypes.

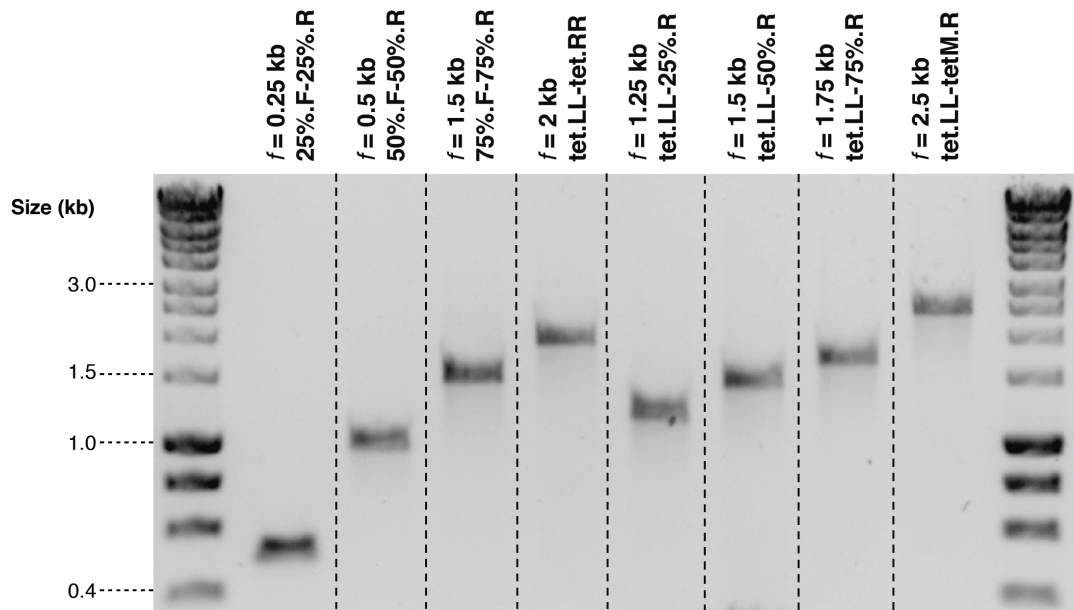

1

2 **Figure S13** – DNA used to assay the properties of homologous arms required for  
3 deletion of regions of heterology. These lanes show the size, concentration and  
4 purity of the PCR amplicons from *tetM* used to remove *L* kb insertions from  
5 within the *tetM* gene, as shown in Fig 3. Each lane is labelled at the top with the  
6 fragment size, *f*, and the primer pair used to generate the amplicon (Table S2).  
7 Each of these was mixed with genomic DNA from a rifampicin-resistant *S.*  
8 *pneumoniae* TIGR4 $\Delta$ *cps* mutant, which was added to each transformation shown  
9 in Fig 3 in order to standardise  $e_D\{j\}$  rates by  $e\{S\}$  rates.

10

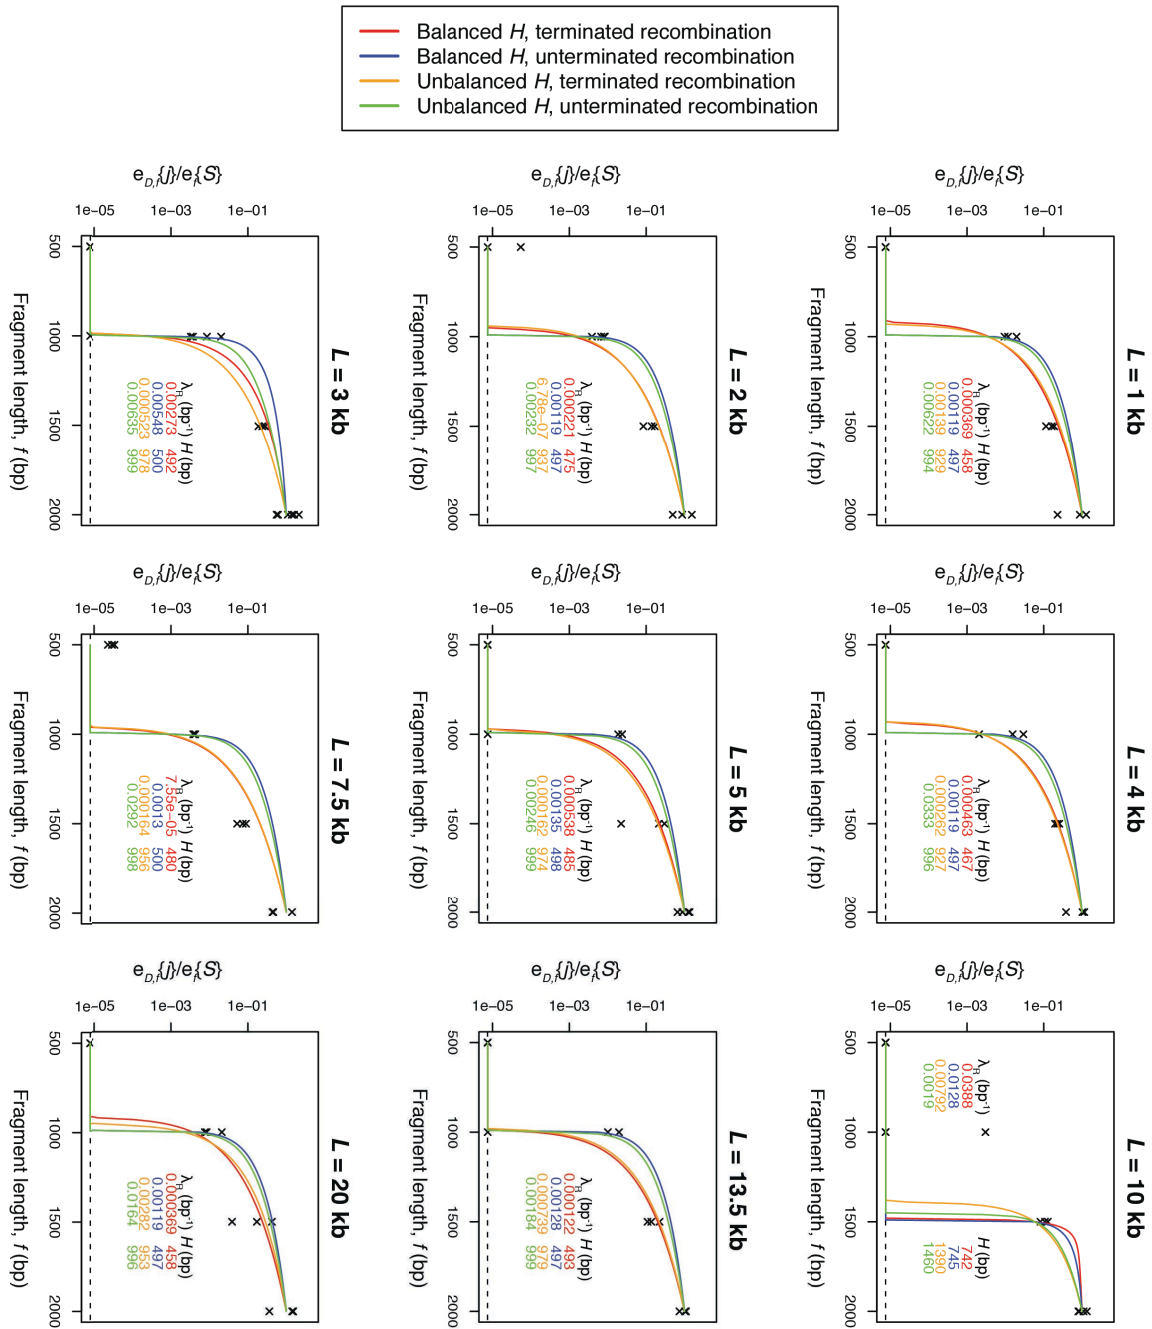

1  
 2 **Figure S14** – Separate fits of the homologous arm length models to each R6I-Li  
 3 genotype used as a recipient in the experiments included in Fig 3B. Each panel  
 4 shows the least squares fit of the four models described in Text S2 to the three  
 5 replicates for each of the R6I-Li genotypes. The estimated  $H$  and  $\lambda_R$  for each fit  
 6 are shown on each plot, coloured according to the model structure, as indicated  
 7 by the key.

8

9

1

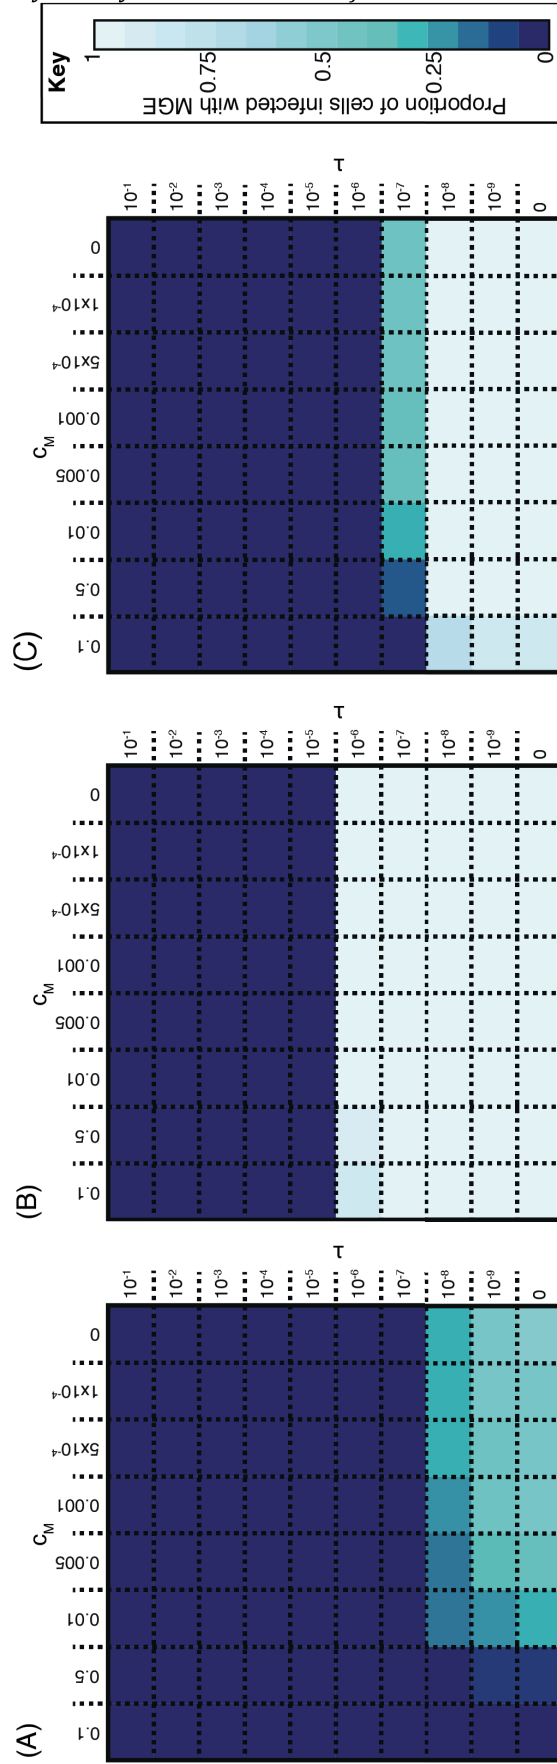

1 **Figure S15** - Simulating the conflict between mobile genetic elements (MGEs)  
2 and transformation with transformation asymmetries estimated from this work.  
3 Simulations were run using a previously described model (Croucher et al. 2016).  
4 Each parameter set was run in triplicate for 1,000 units of time, with  $10^3$   
5 timesteps per unit of time. Simulations had the same growth rates ( $\gamma = 0.2 t^{-1}$ ),  
6 washout rate ( $\omega = 0.6 t^{-1}$ ) and carrying capacity ( $\kappa = 10^6$ ) as previously, with no  
7 cell-cell killing or competence phase ( $g_c = k_c = e_c = 0$ ). Each heatmap cell's colour  
8 represents the mean prevalence of the relevant MGE across three replicate  
9 simulations, according to the key. The horizontal axis shows variation in the  
10 fitness cost of the MGE to its host bacterium,  $c_M$ ; where  $c_M = 0$ , the MGE is neutral.  
11 The vertical axis shows variation in the rate of transformation,  $\tau$ ; where  $\tau = 0$ ,  
12 bacterial evolution is entirely clonal. (A) Simulating the evolutionary dynamics of  
13 a neutral or deleterious IS insertion, which was not autonomously transmissible  
14 ( $\beta = 0$ ), did not kill its host cell on activation ( $a = 0$ ) and was 1 kb in length ( $\varphi_L =$   
15  $0.29$ ). Transformation efficiently removed such IS elements at high  $\tau$ , despite  $\varphi_L$   
16 being close to one and many simulated insertions being near-neutral in terms of  
17 selective cost. (B) Simulating the evolutionary dynamics of a prophage, based on  
18 the 'more horizontal' MGE parameterised previously. Consequently, this MGE  
19 was highly transmissible ( $\beta = 10^{-4}$ , activation rate of  $f = 0.05$ , burst size of  $b = 10$ ),  
20 killed its host cell on activation ( $a = 1$ ) and was 30 kb in length ( $\varphi_L = 1.2 \times 10^{-5}$ ).  
21 Transformation is only effective at eliminating this MGE from the population at  
22 high  $\tau$ , as this element rapidly transmits horizontally between cells, with little  
23 dependence on 'vertical' transmission, which can be inhibited by transformation.  
24 (C) Simulating the evolutionary dynamics of an integrative and conjugative  
25 element, based on the 'high  $\beta$  more vertical' MGE parameterised previously. This  
26 was infrequently transmitted with high efficiency ( $\beta = 10^{-1}$ ,  $b = 5$ ,  $f = 0.005$ ), did  
27 not kill its host cell on activation ( $a = 0$ ) and was 80 kb in length ( $\varphi_L = 3.5 \times 10^{-13}$ ).  
28 Such highly asymmetric transformation efficiently blocks the transmission of this  
29 MGE.  
30

1 **Supplementary Tables**

2

3 **Table S1** - Parameters from fitting models for homologous arm lengths to  
 4 datasets stratified by  $L$ . Where  $L$  is specified as a number, the values refer to the  
 5 fit to transformations of a particular R6I- $L$ i genotype; where  $L$  is defined as 'All',  
 6 it refers to the overall fit in Fig 3B; and where it is defined as '10 (unbalanced)', it  
 7 refers to the experiments shown in Fig 3D.

8

| Model                                    | $L$ (kb) | $\lambda_R$ (bp <sup>-1</sup> ) | $H$ (bp) |
|------------------------------------------|----------|---------------------------------|----------|
| Balanced H, terminated recombination     | All      | 5.45E-05                        | 469      |
| Balanced H, unterminated recombination   | All      | 1.83E-05                        | 494      |
| Unbalanced H, terminated recombination   | All      | 2.78E-05                        | 469      |
| Unbalanced H, unterminated recombination | All      | 5.43E-02                        | 499      |
| Balanced H, terminated recombination     | 1        | 3.69E-04                        | 458      |
| Balanced H, unterminated recombination   | 1        | 1.19E-03                        | 497      |
| Unbalanced H, terminated recombination   | 1        | 1.39E-03                        | 465      |
| Unbalanced H, unterminated recombination | 1        | 6.22E-03                        | 498      |
| Balanced H, terminated recombination     | 2        | 2.21E-04                        | 476      |
| Balanced H, unterminated recombination   | 2        | 1.19E-03                        | 497      |
| Unbalanced H, terminated recombination   | 2        | 6.78E-07                        | 469      |
| Unbalanced H, unterminated recombination | 2        | 2.32E-03                        | 499      |
| Balanced H, terminated recombination     | 3        | 2.73E-03                        | 492      |
| Balanced H, unterminated recombination   | 3        | 5.48E-03                        | 500      |
| Unbalanced H, terminated recombination   | 3        | 5.23E-04                        | 489      |
| Unbalanced H, unterminated recombination | 3        | 6.35E-03                        | 500      |
| Balanced H, terminated recombination     | 4        | 4.63E-04                        | 467      |
| Balanced H, unterminated recombination   | 4        | 1.19E-03                        | 497      |
| Unbalanced H, terminated recombination   | 4        | 2.62E-04                        | 464      |
| Unbalanced H, unterminated recombination | 4        | 3.33E-02                        | 498      |
| Balanced H, terminated recombination     | 5        | 5.38E-04                        | 486      |
| Balanced H, unterminated recombination   | 5        | 1.35E-03                        | 498      |



|                                          |                    |          |     |
|------------------------------------------|--------------------|----------|-----|
| Unbalanced H, terminated recombination   | 5                  | 1.62E-04 | 487 |
| Unbalanced H, unterminated recombination | 5                  | 2.46E-03 | 500 |
| Balanced H, terminated recombination     | 7.5                | 7.55E-05 | 481 |
| Balanced H, unterminated recombination   | 7.5                | 1.30E-03 | 500 |
| Unbalanced H, terminated recombination   | 7.5                | 1.64E-04 | 478 |
| Unbalanced H, unterminated recombination | 7.5                | 2.92E-02 | 500 |
| Balanced H, terminated recombination     | 10                 | 3.88E-02 | 743 |
| Balanced H, unterminated recombination   | 10                 | 1.28E-02 | 746 |
| Unbalanced H, terminated recombination   | 10                 | 7.92E-03 | 695 |
| Unbalanced H, unterminated recombination | 10                 | 1.90E-03 | 730 |
| Balanced H, terminated recombination     | 13.3               | 1.22E-04 | 493 |
| Balanced H, unterminated recombination   | 13.3               | 1.28E-03 | 497 |
| Unbalanced H, terminated recombination   | 13.3               | 7.39E-04 | 490 |
| Unbalanced H, unterminated recombination | 13.3               | 1.84E-03 | 500 |
| Balanced H, terminated recombination     | 20                 | 3.69E-04 | 458 |
| Balanced H, unterminated recombination   | 20                 | 1.19E-03 | 497 |
| Unbalanced H, terminated recombination   | 20                 | 2.82E-03 | 477 |
| Unbalanced H, unterminated recombination | 20                 | 1.64E-02 | 498 |
| Balanced H, terminated recombination     | 10<br>(unbalanced) | 7.25E-05 | 250 |
| Balanced H, unterminated recombination   | 10<br>(unbalanced) | 1.12E-04 | 212 |
| Unbalanced H, terminated recombination   | 10<br>(unbalanced) | 3.19E-05 | 588 |
| Unbalanced H, unterminated recombination | 10<br>(unbalanced) | 9.45E-03 | 623 |

1

- 1 **Table S2** - Primers used in the procedures described in this study. The  
 2 restriction enzyme cut sites are underlined in the sequences.  
 3

| Primer name | Forward/Reverse | Sequence                                   | 5' restriction sites |
|-------------|-----------------|--------------------------------------------|----------------------|
| ivr.LL      | F               | cgcaaggaagctggtattaca                      | -                    |
| ivr.CR.A    | R               | gtaggg <u>ccc</u> cttccatcagcaaacttcca     | <i>Apal</i>          |
| ivr.CR.B    | R               | gtaggat <u>cc</u> cttccatcagcaaacttcca     | <i>BamHI</i>         |
| ivr.CL      | F               | gtaggatc <u>ct</u> gaaccctccgattctaaaa     | <i>BamHI</i>         |
| ivr.RR      | R               | caatctgaagacctagaaccttgct                  | -                    |
| Jns.F       | F               | ttggg <u>cccc</u> ggttgatttttaatggataatgtg | <i>Apal</i>          |
| Jns.R       | R               | atggat <u>ccc</u> cttctctatgctttggacg      | <i>BamHI</i>         |
| tet.LL      | F               | cgacagccagtgactttcc                        | -                    |
| tet.LLX     | F               | tatctagacgacagccagtgactttcc                | <i>XbaI</i>          |
| tet.CRA     | R               | taggg <u>ccc</u> gagtttgctgtacgcca         | <i>Apal</i>          |
| tet.CRB     | R               | tagggat <u>cc</u> gagtttgctgtacgcca        | <i>BamHI</i>         |
| tet.CLB     | F               | gccggat <u>ccc</u> atgcacttaggaaaatgggga   | <i>BamHI</i>         |
| tet.RR      | R               | tgtactccgctccctaatggaa                     | -                    |
| 2A          | F               | tagcggactgacacaatgga                       | -                    |
| 2B          | R               | taggg <u>ccc</u> aatcaaccgtcccctcactt      | <i>Apal</i>          |
| 3A          | L               | taggat <u>cc</u> gaccgactacaagacaagaaca    | -                    |
| 3B          | R               | tatctagacaatcaaaagaagtagtcgggg             | <i>XbaI</i>          |
| 4A          | L               | taggat <u>cc</u> accagcccagattccaaca       | <i>BamHI</i>         |
| 4B          | R               | tatctagatttcatgaacagaagaagcaggc            | <i>XbaI</i>          |
| 5A          | L               | tgatttctgctcactgac                         | -                    |
| 5B          | R               | tatctagaccacaggtcaataccgatac               | <i>XbaI</i>          |
| 7.5A        | L               | taggat <u>cc</u> aaagcctatctactgtccg       | <i>BamHI</i>         |
| 7.5B        | R               | tggtcggctatactggtact                       | -                    |
| 8.5A        | L               | actttgggattcctgtggct                       | -                    |
| 8.5B        | R               | ttctagatccagttctccgacaatgct                | <i>XbaI</i>          |
| 10A         | L               | taggat <u>cc</u> agcctattatgcagtcctgga     | <i>BamHI</i>         |

|                 |   |                                                  |              |
|-----------------|---|--------------------------------------------------|--------------|
| 10B             | R | tgagttcgccaatggaagt                              | -            |
| 11A             | L | atccaacagcagacagtcca                             | -            |
| 11B             | R | tatctagaacttctgcgtcttcaatggg                     | <i>XbaI</i>  |
| 17A             | L | cctttccagctccagatgt                              | -            |
| 17B             | R | tatctagacc <del>ca</del> acaagcctatcgttcc        | <i>XbaI</i>  |
| 18A             | L | taggatccagctaatacagtttcacagct                    | <i>BamHI</i> |
| 18B             | R | gtctatgcggtacaaggggt                             | -            |
| kan.L           | F | gtagggcccggtggtttcaaaatcggctcc                   | <i>Apal</i>  |
| kan.R           | R | gtaggatccgggaccctatctagcgaac                     | <i>BamHI</i> |
| tetM.L          | F | tagggcccgttaataaatatgcggcaag                     | <i>Apal</i>  |
| tetM.R          | R | taggatccctaagttat <del>tt</del> tattgaacatatatcg | <i>BamHI</i> |
| ermB.L          | F | tagggcccggcggaacgtaaagaag                        | <i>Apal</i>  |
| ermB.R          | R | gccggatccgaattatttctcccgttaataatag               | <i>BamHI</i> |
| rpoB.L          | F | cgygarcbatgtcngtwca                              | -            |
| rpoB.R          | R | tcrtncgwgtyarccaaac                              | -            |
| insertLadder.1F | F | agtcgctaggtagaaaggagac                           | -            |
| insertLadder.1R | R | gttcatgggagcaaaggac                              | -            |
| insertLadder.2F | F | cgacaacagacgtacagcag                             | -            |
| insertLadder.2R | R | tgaaagccacaggaatcc                               | -            |
| insertLadder.3F | F | cgtgtcactctttgcagtg                              | -            |
| insertLadder.3R | R | tggtcggctatactggtact                             | -            |
| insertLadder.4F | F | gccattcgtgcagtaaccaa                             | -            |
| insertLadder.4R | R | cgtccaagtttccgctgtag                             | -            |
| insertLadder.5F | F | tgtgggaagtcgtgtgatga                             | -            |
| insertLadder.5R | R | agtgggatatgctgggtcac                             | -            |
| 25%.F           | F | cagaattaggaagcgtggac                             | -            |
| 25%.R           | R | tgctttcctctgttcgagt                              | -            |
| 50%.F           | F | cctttatcatgtgattctaaagtatc                       | -            |
| 50%.R           | R | tgtaattttat <del>tttt</del> tcctttcc             | -            |
| 75%.F           | F | gaaaagaacgggagtaattggaag                         | -            |

1 **Supplementary References**

2

3 Croucher NJ, Coupland PG, Stevenson AE, Callendrello A, Bentley SD, Hanage WP.

4 2014. Diversification of bacterial genome content through distinct  
5 mechanisms over different timescales. *Nat. Commun.* 5:5471.

6 Croucher NJ, Harris SR, Barquist L, Parkhill J, Bentley SD. 2012. A high-resolution  
7 view of genome-wide pneumococcal transformation. *PLoS Pathog*

8 8:e1002745.

9 Croucher NJ, Harris SR, Fraser C, Quail MA, Burton J, van der Linden M, McGee L,  
10 von Gottberg A, Song JH, Ko KS, et al. 2011. Rapid pneumococcal evolution in  
11 response to clinical interventions. *Science* 331:430–434.

12 Croucher NJ, Mostowy R, Wymant C, Turner P, Bentley SD, Fraser C. 2016.

13 Horizontal DNA Transfer Mechanisms of Bacteria as Weapons of  
14 Intragenomic Conflict. *PLOS Biol.* 14:e1002394.

15 Croucher NJ, Walker D, Romero P, Lennard N, Paterson GK, Bason NC, Mitchell

16 AM, Quail MA, Andrew PW, Parkhill J, et al. 2009. Role of conjugative  
17 elements in the evolution of the multidrug-resistant pandemic clone

18 *Streptococcus pneumoniae*<sup>Spain23F</sup> ST81. *J Bacteriol* 191:1480–1489.

19 Henningsen A, Toomet O. 2011. MaxLik: A package for maximum likelihood

20 estimation in R. *Comput. Stat.* 26:443–458.

21 Pearce BJ, Iannelli F, Pozzi G. 2002. Construction of new unencapsulated (rough)

22 strains of *Streptococcus pneumoniae*. *Res. Microbiol.* 153:243–247.

23 Shoemaker NB, Smith MD, Guild WR. 1980. DNase-resistant transfer of

24 chromosomal *cat* and *tet* insertions by filter mating in *Pneumococcus*.

25 *Plasmid* 3:80–87.

26 Sung CK, Li H, Claverys JP, Morrison DA. 2001. An *rpsL* cassette, Janus, for gene

27 replacement through negative selection in *Streptococcus pneumoniae*. *Appl.*

28 *Environ. Microbiol.* 67:5190–5196.

29 Tiraby JG, Fox MS. 1973. Marker discrimination in transformation and mutation

30 of pneumococcus. *Proc. Natl. Acad. Sci. U. S. A.* 70:3541–3545.

31
